# An Electrophysiological Marker of Arousal Level in Humans

Janna D. Lendner<sup>1,2\*</sup>, Randolph F. Helfrich<sup>1,3</sup>, Bryce A. Mander<sup>4</sup>, Luis Romundstad<sup>3</sup>,  
Jack J. Lin<sup>6</sup>, Matthew P. Walker<sup>1,7</sup>, Pal G. Larsson<sup>8</sup> and Robert T. Knight<sup>1,7</sup>

<sup>1</sup> *Helen Wills Neuroscience Institute, UC Berkeley, 132 Barker Hall, Berkeley, CA 94720, USA*

<sup>2</sup> *Department of Anesthesiology, University Medical Center Hamburg Eppendorf, Martinistrasse 52, 20246  
Hamburg, Germany*

<sup>3</sup> *Department of Psychology, University of Oslo, Forskningsveien 3A, 0373 Oslo, Norway*

<sup>4</sup> *Dept. of Psychiatry and Human Behavior, UC Irvine, Irvine Hall 109, CA 92697, USA*

<sup>5</sup> *Dept. of Anesthesiology, University of Oslo Medical Center, Sognsvannsveien 20, 0372 Oslo, Norway*

<sup>6</sup> *Dept. of Neurology, UC Irvine, 101 The City Drive, Orange, CA 92868, USA*

<sup>7</sup> *Dept. of Psychology, UC Berkeley, Tolman Hall, Berkeley, CA 94720, USA*

<sup>8</sup> *Dept. of Neurosurgery, University of Oslo Medical Center, Sognsvannsveien 20, 0372 Oslo, Norway*

## Corresponding author

Janna D. Lendner, 132 Barker Hall, Knight Lab, Helen Wills Neuroscience Institute,  
University of California, Berkeley, CA 94720-3190, USA, phone: +1-510-6430-9744.  
email: [jlendner@berkeley.edu](mailto:jlendner@berkeley.edu)

21 **Abstract**

22           Deep non-rapid eye movement sleep (NREM) – also called slow wave sleep  
23 (SWS) – and general anesthesia are prominent states of reduced arousal linked to the  
24 occurrence of slow oscillations in the electroencephalogram (EEG). Rapid eye  
25 movement (REM) sleep, however, is also associated with a diminished arousal level,  
26 but is characterized by a desynchronized, ‘wake-like’ EEG. This observation challenges  
27 the notion of oscillations as the main physiological mediator of reduced arousal. Using  
28 intracranial and surface EEG recordings in four independent data sets, we establish the  
29 1/f spectral slope as an electrophysiological marker that accurately delineates  
30 wakefulness from anesthesia, SWS and REM sleep. The spectral slope reflects the  
31 non-oscillatory, scale-free measure of neural activity and has been proposed to index  
32 the local balance between excitation and inhibition. Taken together, these findings  
33 reconcile the long-standing paradox of reduced arousal in both REM and NREM sleep  
34 and provide a common unifying physiological principle — a shift in local Excitation/  
35 Inhibition balance — to explain states of reduced arousal such as sleep and anesthesia  
36 in humans.

37

38 **Keywords**

39 Arousal, electrophysiology, sleep, anesthesia, 1/f-dynamics

40

41

## 42 **Significance Statement**

43 The clinical assessment of arousal levels in humans depends on subjective measures  
44 such as responsiveness to verbal commands. While non-rapid eye movement (NREM)  
45 sleep and general anesthesia share some electrophysiological markers, rapid eye  
46 movement sleep (REM) is characterized by a ‘wake-like’ electroencephalogram. Here,  
47 we demonstrate that non-oscillatory, scale-free electrical brain activity — recorded from  
48 both scalp electroencephalogram and intracranial recordings in humans — reliably  
49 tracks arousal levels during both NREM and REM sleep as well as under general  
50 anesthesia with propofol. Our findings suggest that non-oscillatory brain activity can be  
51 used effectively to monitor vigilance states.

52

## 53 **Introduction**

54 Sleep and anesthesia both present with a behaviorally similar state of diminished  
55 arousal(1) and shared neurophysiologic features, namely increased low frequency  
56 power(2, 3) and a reduction in effective connectivity(4, 5). It has been argued that the  
57 reduced arousal in both states stems from a common neuronal mechanism. Current  
58 definitions of arousal vary and include e.g. autonomic, behavioral or mental arousal. An  
59 updated framework has been proposed recently(6). Here, we use the term arousal in its  
60 relation to vigilance states.

61 Most studies comparing sleep and anesthesia concentrated on slow-wave sleep  
62 and oscillatory dynamics such as slow waves ( $< 1.25$  Hz)(1, 7, 8) as an increased  
63 activity in this frequency band has been associated with reduced arousal(1, 3). REM  
64 sleep is also associated with decreased arousal but is characterized by a

65 desynchronized, active pattern in the electroencephalogram (EEG) similar to  
66 wakefulness(8). This paradox challenges the notion that changes in oscillatory activity  
67 such as slow waves are the exclusive determinant of reduced arousal.

68 Non-oscillatory, scale-free neural activity constitutes an important index of brain  
69 physiology and behavior(9–11). In the frequency domain, the scaling law between the  
70 power and the frequency of non-oscillatory brain activity can be estimated from the  
71 exponential decay of the power spectral density(9) and has previously been used to  
72 assess a variety of cognitive and EEG phenomena(12–18). A variety of terms have  
73 been used to describe this power-frequency relationship, such as power-law  
74 distribution, scale-free behavior,  $1/f$  electrophysiological noise, fractal/spectral  
75 exponent(12, 17, 19) or fractal dynamics(9, 20–22). The exponent of the  $1/f$  power-law  
76 distribution, also called spectral slope, differs between rest and task activity(9, 10) and  
77 changes with aging(21). Fractal dynamics and neural avalanches have also been  
78 observed in long-range temporal correlations of band-limited signals(23), however, it is  
79 likely that these two phenomena may reflect distinct entities with a different  
80 neurophysiological basis(9). Here, we focus on the fractal  $1/f$  dynamics of the  
81 background activity.

82 Computational simulations indicate that the spectral slope provides a surrogate  
83 marker for the excitatory to inhibitory (E/I) balance with more negative slope values  
84 indexing enhanced inhibition(10, 20, 22) (Fig. S1), while others have observed the  
85 reversed pattern(11).

86 For this study, we followed the framework of Laureys et al. that defined  
87 consciousness on two axis – content (awareness) and level (arousal)(24). While the

88 conscious content is low in NREM sleep and GABAergic anesthesia, it is high in  
89 wakefulness and dreaming states like REM. The arousal level, on the other hand, is low  
90 in all sleep states including REM. We hypothesized that states of reduced arousal are  
91 characterized by a shift of the E/I balance towards inhibition indexed by more negative  
92 slopes. To test this prediction, we analyzed four independent datasets:  
93 Electrophysiological recordings during sleep using either scalp EEG (Study 1,  $n = 20$ ) or  
94 combined scalp and intracranial EEG (Study 2,  $n = 10$ ; coverage see Fig. S2a) as well  
95 as under general anesthesia with propofol combined with scalp EEG (Study 3,  $n = 9$ ) or  
96 intracranial EEG (Study 4,  $n = 12$ ; subdural grid electrodes (electrocorticography;  
97 ECoG) and stereotactically placed depth electrodes (SEEG); coverage see Fig. S2b).

98

## 99 **Results**

100           During a full night of sleep, the time-resolved spectral slope closely  
101 tracked the hypnogram (Fig. 1a). In the scalp EEG group (Study 1,  $n = 20$ ; a baseline  
102 rest recording was available in  $n = 14$ ), we observed a decrease from values of  $-1.87 \pm$   
103  $0.18$  (mean  $\pm$  SEM) during quiescent rest to  $-3.46 \pm 0.16$  in NREM (N3) and  $-4.73 \pm 0.23$   
104 in REM sleep (Fig. 1b). These differences were significant across all scalp EEG  
105 channels (repeated-measures ANOVA:  $p < 0.0001$ ,  $F_{1,94, 25.17} = 56.05$ ,  $d_{\text{Rest-Sleep}} = 3.07$ ).  
106 Furthermore, N2 sleep exhibited an average slope of  $-3.67 \pm 0.10$  that was also  
107 significantly below rest ( $n = 14$ ;  $p_{\text{Rest-N2}} < 0.0001$ ;  $t_{13} = 7.97$ ;  $d_{\text{Rest-N2}} = 3.31$ ; Fig. S3a).  
108 Post-hoc t-tests (uncorrected) revealed a significant difference between rest and N3  
109 ( $p_{\text{Rest-N3}} < 0.0001$ ,  $t_{13} = 5.69$ ,  $d_{\text{Rest-N3}} = 2.49$ ), between rest and REM ( $p_{\text{Rest-REM}} < 0.0001$ ,

110  $t_{13} = 11.67$ ,  $d_{\text{Rest-REM}} = 3.71$ ) and between N3 and REM sleep ( $p_{\text{N3-REM}} = 0.0007$ ,  $t_{13} =$   
 111  $4.44$ ,  $d_{\text{N3-REM}} = 1.70$ ).

112

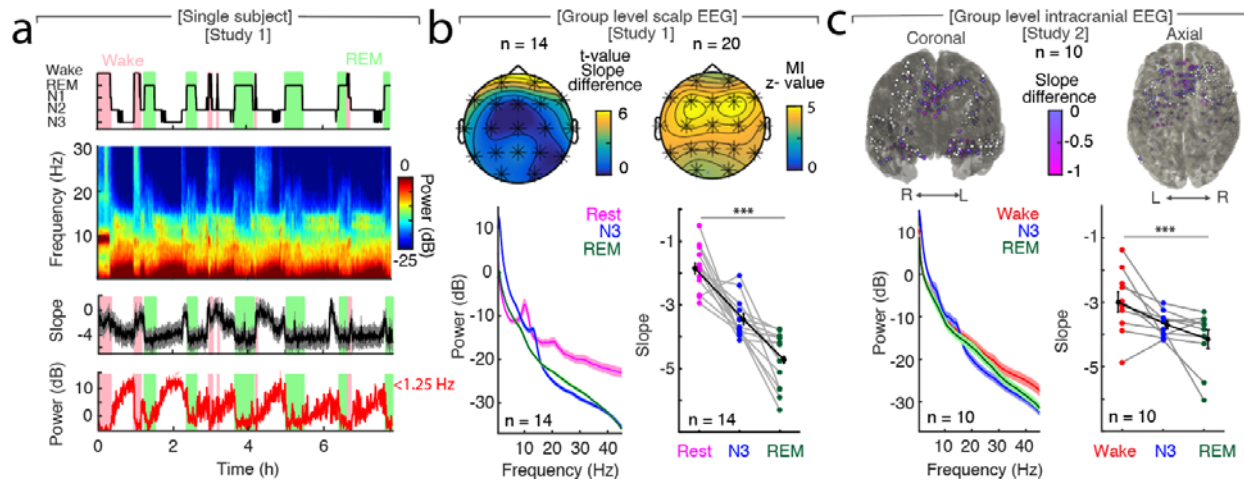

113

114 **Fig. 1: The spectral slopes tracks changes of arousal level in sleep.** a, Time-  
 115 resolved average of three frontal EEG channels (F3, Fz, F4) during a night of sleep.  
 116 Upper panel: Expert-scored hypnogram (black), wake (pink), REM (light green). Upper  
 117 middle: Time-frequency decomposition. Lower middle: Spectral slope (black; mean ±  
 118 SEM). Lower panel: Low-frequency (<1.25 Hz) power (red; mean ± SEM). b, Sleep in  
 119 scalp EEG. Upper panel: Left: Cluster permutation test of slope difference between  
 120 sleep and rest (n = 14). \* p < 0.05. Right: Mutual Information between the time-resolved  
 121 slope and hypnogram (n = 20). Cluster permutation test against surrogate distribution  
 122 created by random block swapping: \* p < 0.05. Lower panel: Left - Power spectra (n =  
 123 14; mean ± SEM); Right - Spectral slope (n = 14). Rest (magenta), NREM stage 3  
 124 (blue), REM sleep (green) and grand average (black; mean ± SEM). Repeated  
 125 measures ANOVA: \*\*\* p < 0.001. c, Sleep in intracranial study (n = 10). Upper panel:  
 126 Left - coronal, right - axial view of intracranial channels that followed (magenta) or did  
 127 not follow (white) the EEG pattern of a lower slope during sleep (REM/NREM 3). Lower  
 128 panel: Left - Power spectra (mean ± SEM); Right - Spectral slope of simultaneous EEG  
 129 recordings (Fz, Cz, C3, C4, Oz). Wakefulness (red), NREM stage 3 (N3; blue), REM  
 130 sleep (green) and grand average (black; mean ± SEM). Repeated measures ANOVA:  
 131 \*\*\* p = 0.001.

132

133 If all the available wake periods before, during and after the sleep recordings  
 134 were utilized for slope analysis (n = 20), it resulted in a higher variability across subjects  
 135 during wakefulness (Fig. S3b), which can be explained by the fact that the subjects  
 136 were already or still drowsy and data during state transitions was included. However,

137 the overall pattern was remarkably similar (Fig. S3c). As this approach increased our  
138 available data, we used all wake trials (referred to as wake) for subsequent analysis.

139 To assess where on the scalp the slope tracks arousal states best, we calculated  
140 the Mutual Information (MI) between the time-resolved spectral slope and the  
141 hypnogram in all 20 subjects. We observed a significant positive cluster across all  
142 sensors, which peaked over frontal electrodes F3, Fz and F4 (Fig. 1b).

143 Cranial muscle activity has similar frequency characteristics in the 30-70 Hz  
144 range and might confound spectral slope estimates. Therefore, we controlled for any  
145 impact of muscle activity by repeating the analysis after local referencing (Laplacian,  
146  $p_{\text{Spearman}} < 0.001$ ;  $p_{\text{MI}} < 0.0001$ ) and additionally utilized partial correlations that  
147 considered the slope of the electromyography (EMG) as a confounding variable  
148 ( $p_{\text{Spearman}} < 0.001$ ). All control analyses confirmed that the observed effect was not  
149 confounded by muscle activity (Fig. S4).

150 During REM sleep, power in the slow wave range (SO power;  $<1.25$  Hz) was  
151 comparable to wakefulness corroborating the observation of a 'wake-like' EEG pattern  
152 in REM and the paucity of slow oscillations ( $p = 0.423$ ,  $t_{18} = -0.82$ ,  $d = -0.25$ ; Fig. 1a).  
153 The spectral slope, however, was significantly different between these states. To further  
154 quantify this effect, we trained a classifier (linear discriminant analysis; LDA) to  
155 discriminate between REM sleep and wakefulness using either the spectral slope or SO  
156 power ( $n = 18$ ). The classifier performance was significantly better for the spectral slope  
157 compared to SO power when differentiating between REM and waking ( $78.75 \pm 2.98$  %  
158 (mean  $\pm$  SEM) vs.  $60.03 \pm 3.72$  %;  $p = 0.0023$ ,  $t_{17} = 3.58$ ,  $d_{\text{Slope-SO power}} = 1.21$ , chance  
159 level: 50 %). When differentiating between N3 sleep and wakefulness, both spectral

160 slope and SO power had a classifier performance that was significantly above the 50 %  
161 chance level (for slope  $p < 0.001$  vs. for SO power  $p < 0.001$ ) and comparable to each  
162 other ( $73.05 \pm 2.97$  % for spectral slope vs.  $82.09 \pm 2.13$  % for SO power,  $p = 0.0423$ ,  
163  $t_{17} = -2.19$ ,  $d_{\text{Slope-SO power}} = -0.83$ ). Likewise, when all three states were classified  
164 simultaneously, both SO power and the spectral slope performed well above chance  
165 (chance = 33%; SO:  $64.94 \pm 2.04\%$ , mean  $\pm$  SEM;  $t_{17} = 15.04$ ,  $p < 0.001$ ,  $d = 5.01$ ;  
166 slope:  $58.09 \pm 2.35\%$ ;  $t_{17} = 10.55$ ,  $p < 0.001$ ,  $d = 3.52$ ) and did not differ in the overall  
167 performance ( $t_{17} = -1.80$ ,  $p = 0.0899$ ,  $d = -0.63$ ). This is due to the fact that SO power is  
168 advantageous to classify N3 sleep, while the slope is superior to detect REM sleep.  
169 Notably, significant classification is also possible when the spectral slope is estimated at  
170 lower frequencies (e.g. 1-20 Hz;  $84.19\% \pm 2.46$ , paired t-test vs. chance (33%):  $p <$   
171  $0.001$ ,  $t_{17} = 20.64$ ,  $d = 6.88$ ). This effect is partly driven by an increase in low frequency  
172 power needed to correctly classify N3, and is equivalent to using SO power, but the 1-  
173 20 Hz ranges does not track wakefulness and REM, thus, reducing mutual information  
174 with the hypnogram (see also Fig. S7).

175         These results reveal that the spectral slope is a more powerful predictor of REM  
176 sleep than SO power and also reliably discriminates deep N3 sleep from wakefulness.  
177 Furthermore, classification based on the spectral slope provides comparable accuracy  
178 levels in discriminating REM from wakefulness as trained personnel, given that the  
179 inter-rater reliability between sleep scoring experts is typically about 80%(25). Finally,  
180 the discrimination between REM and waking using the spectral slope does not require  
181 simultaneous electrooculography (EOG) or EMG recordings but can be detected solely  
182 from the electrophysiological brain state.



183 In the intracranial recording group (Study 2,  $n = 10$ ), the simultaneous EEG  
184 recordings (Fz, Cz, C3, C4, Oz) again displayed a more negative spectral slope for  
185 reduced arousal levels: From  $-2.99 \pm 0.32$  (mean  $\pm$  SEM) in wakefulness the slope  
186 decreased to  $-3.69 \pm 0.12$  in NREM (N3) to  $-4.15 \pm 0.29$  in REM sleep (Fig. 1c). Again,  
187 these three states were significantly different in a repeated-measures ANOVA ( $p =$   
188  $0.001$ ;  $F_{1,97, 17.74} = 10.79$ ,  $d_{\text{Wake-Sleep}} = 1.12$ ). Post-hoc t-tests (uncorrected) showed a  
189 significant difference between wakefulness and REM ( $p < 0.001$ ;  $t_9 = 4.78$ ;  $d = 1.19$ ) and  
190 wakefulness and N3 ( $p = 0.026$ ;  $t_9 = 2.66$ ;  $d = 0.97$ ) but not between N3 and REM ( $p =$   
191  $0.098$ ;  $t_9 = 1.84$ ;  $d = 0.64$ ).

192 The intracranial SEEG contacts that mirrored the observed scalp EEG pattern  
193 (more negative spectral slope in N3 and REM; 155 of 352 SEEG (44.03 %; significantly  
194 above chance;  $\chi^2 = 8.20$ ,  $p = 0.0042$ ; chi-squared test); Fig. 1c) exhibited a clear  
195 anatomical distribution centered in the medial prefrontal cortex and medial temporal  
196 lobe structures (for Wake - N3 and Wake - REM see Fig. S5a, b; grid electrodes see  
197 Fig. S6a, b), hence, converging on the very same brain regions known to be the most  
198 relevant for sleep-dependent memory consolidation(26–29). Note that we did not  
199 specifically target any brain regions and in contrast to previous studies using grid  
200 electrodes(9, 22), the majority of our probes were stereo-tactically placed depth  
201 electrodes. Given the spatial heterogeneity of intracranial responses(30), the  
202 convergence on medial PFC nicely resembles the observed scalp pattern as observed  
203 at the overlying scalp EEG electrode Fz. The distinct intracranial spatial pattern  
204 combined with the bipolar referencing scheme again confirms that the results are not  
205 confounded by muscle activity.

206 To verify the chosen fit parameters, we reanalyzed the correlation and MI  
207 analysis between hypnogram and time-resolved slope as a function of different center  
208 frequencies and window lengths (Fig. S7). In addition, we explored a wide-range of fit  
209 parameters after discounting the oscillatory components from the PSD by means of  
210 irregular resampling (IRASA(26, 31)). All control analyses corroborated our findings and  
211 indicate that the spectral slope in the range from 30 - 45 Hz reliably tracks arousal  
212 levels and behavioral state transitions (Fig. S7). Given the relationship between spectral  
213 edge frequency and median frequency(32), we assessed the relationship between SO  
214 power and the PSD slope. We observed that the SO power explains  $7.9 \pm 0.01\%$  (mean  
215  $\pm$  SEM) of the variance in the slope, however, a partial correlation with SO power as a  
216 confound does not change the correlation between slope and hypnogram (Fig. S7).

217 On the scalp level, the trough of a slow wave is associated with cortical 'down-  
218 state', while the peak reflects an 'up-state'(33, 34). The spectral slope was able to  
219 reflect these rapid changes during sleep with a more negative 1/f slope observed at  
220 troughs compared to peaks (Fig. S8). This effect was most pronounced over frontal  
221 channels (cluster-based permutation test:  $p = 0.005$ ,  $d_{\text{Trough-Peak}} = -0.65$ ).

222 Slow waves are detected in slow-wave sleep but are also observed during REM  
223 sleep(35) as well as wakefulness(36); albeit less prevalently. We detected a significantly  
224 higher number of slow waves during N3 sleep ( $SO_{N3} = 28.79 \pm 0.79$  per minute; mean  $\pm$   
225 SEM) compared to REM sleep ( $SO_{REM} = 2.16 \pm 0.89$  per minute;  $SO_{N3-REM}$ :  $p < 0.0001$ ,  
226  $t_{19} = 22.64$ ,  $d = 7.05$ ) and wakefulness ( $SO_{Wake} = 5.05 \pm 0.51$  per minute;  $SO_{N3-Wake}$ :  $p <$   
227  $0.0001$ ,  $t_{19} = 25.32$ ,  $d = 6.92$ ; Extended Data Fig. 9c). Interestingly, the averaged slope  
228 at the through of the slow waves was significantly different between arousal states: -

229  $3.40 \pm 0.09$  in slow-wave,  $-4.00 \pm 0.18$  in REM sleep and  $-2.26 \pm 0.12$  in wakefulness  
230 (mean  $\pm$  SEM) mirroring our observation of the overall slope differences (Fig. S9c;  
231 uncorrected for multiple testing: Wake-N3:  $p < 0.0001$ ,  $t_{18} = 7.07$ ,  $d = 2.38$ ; Wake-REM:  
232  $p < 0.0001$ ,  $t_{18} = 9.67$ ,  $d = 2.55$ , N3-REM:  $p = 0.01$ ,  $t_{19} = 2.73$ ,  $d = 0.91$ ). Therefore, the  
233 spectral slope is able to discern arousal even during slow wave events.

234

235 To test if the state-dependent modulation of the spectral slope was sleep-specific  
236 or generalized to other forms of decreased arousal, we analyzed two datasets obtained  
237 during general anesthesia with propofol. Under propofol anesthesia the time-resolved  
238 spectral slope again closely tracked changes in arousal level (Fig. 2a). In both scalp and  
239 intracranial EEG, we observed a more negative spectral slope under anesthesia  
240 compared to wakefulness (Fig. 2b, c): In the scalp EEG group (Study 3,  $n = 9$ ), we  
241 found a decrease from  $-1.81 \pm 0.29$  (mean  $\pm$  SEM) during wakefulness to  $-3.10 \pm 0.19$   
242 under anesthesia. This difference was significant (paired t-test:  $p < 0.0001$ ,  $t_8 = 7.73$ ,  
243  $d_{\text{Wake-Anesthesia}} = 1.71$ ) and in a cluster-based permutation test, the effect formed one  
244 single cluster spanning all 25 electrodes ( $p < 0.001$ ).

245

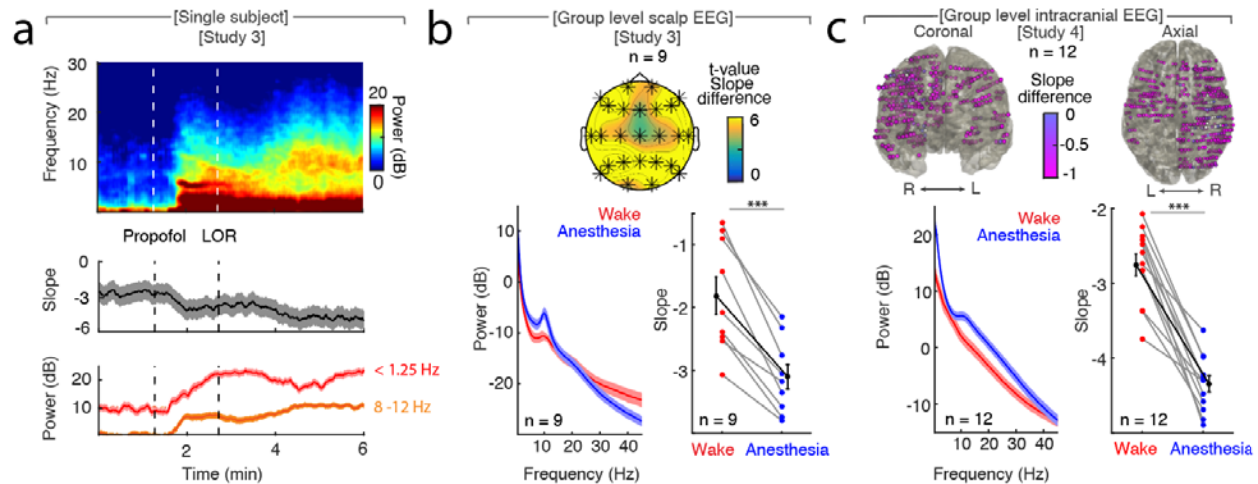

246

247 **Fig. 2: The spectral slope tracks changes in arousal level under general**  
 248 **anesthesia with propofol.**

249 **a**, Time-resolved average of 35 intracranial frontal channels during anesthesia. Upper  
 250 panel: Time-frequency decomposition. Dotted white lines: Induction with propofol, loss  
 251 of responsiveness (LOR). Middle: Spectral slope (black; mean  $\pm$  SEM). Lower panel:  
 252 Low frequency (<1.25 Hz; red) and alpha (8 – 12 Hz; orange) power (mean  $\pm$  SEM). **b**,  
 253 Anesthesia in scalp EEG (n = 9). Upper panel: Spatial extent of spectral slope  
 254 difference. Cluster permutation test: \* p < 0.05. Lower panel: Left - Power spectra  
 255 (mean  $\pm$  SEM); Right – Spectral slope. Wakefulness (red), anesthesia (blue) and grand  
 256 average (black; all mean  $\pm$  SEM). Paired t-test \*\*\* p < 0.001. **c**, Anesthesia in  
 257 intracranial recordings (n = 12). Upper panel: Left – coronal, right – axial view of slope  
 258 difference. Lower panel: Left – Power spectra; Right – Spectral slope. Wakefulness  
 259 (red), anesthesia (blue) and grand average (black; mean  $\pm$  SEM). Paired t-test: \*\*\* p <  
 260 0.001.  
 261

262 In the intracranial recordings (Study 4, n = 12), we observed a spectral slope of  
 263  $-2.75 \pm 0.15$  during wakefulness and  $-4.34 \pm 0.11$  under anesthesia. Again, this  
 264 difference was significant (paired t-test: p < 0.0001,  $t_{11} = 9.93$ ,  $d_{\text{Wake-Anesthesia}} = 3.57$ ) and  
 265 could be detected in the majority of electrodes (470 of 485 SEEG (96.9 %); Fig. 2c).  
 266 Patients who were implanted with surface grid in addition to depth electrodes (n = 4)  
 267 showed the same pattern: The spectral slope decreased from wakefulness to  
 268 anesthesia in the majority of the recording sites (129 of 147 ECoG (87.75 %); Fig. S6c).

269           These findings demonstrate that the spectral slope reliably differentiates between  
270 wakefulness and general anesthesia in humans(22). Future studies will be needed to  
271 determine the reliability of this marker on larger cohorts to establish clinical usability. In  
272 both scalp and intracranial recordings, we observed a brain-wide decrease in the  
273 spectral slope, supporting the notion that propofol anesthesia induces a global brain-  
274 wide state of increased inhibition(8).

275

276

## 277 **Discussion**

278 Collectively, the results from these four studies provide five main advances. First,  
279 the spectral slope tracks changes in arousal levels in both sleep and anesthesia with  
280 high temporal precision from sub-second epochs to full night recordings. Note that the  
281 slope differences between wakefulness and states of reduced arousal show a similar  
282 pattern on the scalp level (Fig. 1b, 2b).

283 According to the framework proposed by Laureys et al., consciousness can be  
284 assessed on two axis – the content (e.g. awareness) and the level (e.g. arousal)(24),  
285 however, an updated framework has recently been proposed(6). Our definition of  
286 arousal is similar to what has been described as vigilance. However, our  
287 neurophysiological investigations did not set out to test one specific framework, but we  
288 do interpret our findings in light of previously published definitions. Hence, we assume  
289 that our marker does not track conscious thoughts, content or awareness, but indexes a  
290 vigilance state. While the arousal level is reduced in all three states, conscious content  
291 is thought to fluctuate during sleep, mostly in the form of dreams during REM(37). Thus,  
292 measures such as the Perturbational Complexity Index(38) that might track the level of  
293 consciousness are decreased in slow-wave sleep and GABAergic anesthesia but are  
294 maintained to a certain degree during REM sleep and ketamine anesthesia, both states  
295 associated with vivid dreams(37–39). These measures are unable – unlike the spectral  
296 slope – to reliably differentiate arousal levels, e.g. wakefulness and REM. Previous  
297 studies in rodents identified markers of reduced arousal in sleep and under general  
298 anesthesia, namely fronto-parietal theta and high-gamma connectivity(39, 40). In  
299 several control analyses we found that the spectral slope was superior to fronto-parietal

300 theta connectivity in tracking sleep stage dependent dynamics ( $p < 0.0001$ ,  $t_{19} = 7.01$ ;  $d$   
301  $= 2.22$ ) and in reliably differentiating REM and slow wave sleep (Fig. S10). Our dataset  
302 did not have a sufficient number of electrodes in the parietal lobe to extend the analysis  
303 to the high-gamma band since this is an infrequent site for epilepsy.

304         Second, the spectral slope provides a mechanistic explanation – a shift of the E/I  
305 balance towards inhibition – for the reduced arousal level in both slow-wave and REM  
306 sleep. The estimation of local E/I balance has been limited to invasive single cell  
307 recordings with a classification of neuron subtypes into excitatory and inhibitory  
308 cells(22). Recent computational simulations, however, demonstrated that local E/I  
309 balance can be inferred from changes of the spectral slope: An increase in inhibition  
310 results in a decrease of slope(11, 22). Our results of a decreased slope in slow-wave  
311 and REM sleep as well as under general anesthesia may be explained by an increase  
312 in inhibition. This interpretation is supported by results of single cell studies in animals  
313 that reported a reduction of multiunit or pyramidal cell activity during not only in slow-  
314 wave but also in REM sleep(41–44). Interestingly, REM exhibited a significantly lower  
315 slope than slow-wave sleep (Fig. S11). This result is in line with previous studies  
316 reporting a lower neuronal firing rate for REM sleep compared to slow-wave sleep(41,  
317 43, 44) that was associated with an increase in inhibitory activity(41, 43). While these  
318 lines of research converge on the notion that the spectral slope tracks the E/I balance of  
319 the underlying population, it might also reflect changes in firing rate or synchronization.  
320 A testable hypothesis that arises from our observations is that cell-type specific causal  
321 manipulations by optogenetics (e.g. pyramidal and SOM interneurons) should bias the  
322 spectral slope in opposite directions.

323 Previous studies utilized a variety of different fit parameters and it is currently  
324 unclear what the ‘best’ range for slope fitting is(12–18). It had been suggested that fits  
325 to different frequencies might index different properties of the underlying population  
326 activity(9, 14, 16, 17). Our results that demonstrate that the range from 30-45 Hz best  
327 correlates (and exhibits significant mutual information) with the hypnogram, which is in  
328 line with recent modeling work indicating a similar range(22). Future studies involving  
329 single neuron recordings will be needed to unravel the precise relationship between  
330 population firing statistics and band-limited changes in the PSD slope. We believe that  
331 in particular comparative studies involving rodents(22, 45), primates(22) and humans  
332 combined with modeling work has the potential to integrate divergent findings into a  
333 coherent framework and to determine the neurophysiologic basis of the spectral slope.  
334 It will be of substantial interest to assess whether neurophysiological mechanisms are  
335 preserved across species, which greatly vary in anatomy, in particular in the prefrontal  
336 cortex(46, 47).

337 Third, the rapid changes in spectral slope observed over the course of a slow  
338 wave are in accordance with the notion that these oscillations orchestrate cortical  
339 activity during sleep by interleaving periods of neural silence with enhanced neural  
340 activity(41). This suggests that E/I balance and arousal level during slow wave sleep are  
341 not constant but wax and wane on a short time scale – whereas they seem to be more  
342 constant during REM sleep(41). This finding is in line with the active, maximal inhibition  
343 during REM sleep observed in single cell recordings of animal cortices(41, 43) and  
344 could explain why epileptic seizures during the night occur predominantly in NREM and  
345 rarely during REM sleep(48).



346           Fourth, our observations support the premise that anesthesia is a brain-wide  
347 state(8), whereas sleep exhibits network-specific activity patterns (e.g. between the  
348 PFC and the hippocampus)(49). This is especially relevant considering the theories of  
349 active memory processing in sleep(50, 51).

350           Fifth, the spectral slope can be reliably estimated from scalp EEG recordings,  
351 providing a potential tool that can be incorporated into intraoperative neuromonitoring,  
352 automatic sleep stage classification algorithms and tracking other states of reduced  
353 arousal such as epileptic seizures, coma and the vegetative or minimally conscious  
354 state.

355

356

357 **Data Availability**

358 Data generated and/or analyzed in the current study is available from the corresponding  
359 author upon reasonable request.

360

361 **Code availability**

362 Custom code used for analyzing the datasets of the current study is available from the  
363 corresponding author upon reasonable request.

364

365 **Acknowledgement**

366 This work was supported by Grant LE 3863/2-1 of the German Research Foundation  
367 (Deutsche Forschungsgemeinschaft (J.D.L.), a National Institute of Neurological  
368 Disorders and Stroke Grant R37NS21135 (R.T.K., J.D.L.), the Alexander von Humboldt  
369 Foundation (Feodor Lynen Program; R.F.H.), an intramural fellowship from the Dept. of  
370 Psychology, University of Oslo (R.F.H.), R01AG03116408 (M.P.W.), RF1AG05401901  
371 (M.P.W.), RF1AG05410601 (M.P.W.) and F32-AG039170 (B.A.M.), all from the National  
372 Institute of Health. We thank Jie Zheng, Julia Kam and the EEG technicians at UC  
373 Irvine Medical Center for their assistance and all the patients for their participation.

374

375 **Author Contribution**

376 Conceptualization, J.D.L, R.F.H., M.P.W. and R.T.K.; Methodology, J.D.L. and R.F.H.;  
377 Software, J.D.L. and R.F.H.; Validation, J.D.L. and R.F.H.; Formal Analysis, J.D.L. and  
378 R.F.H.; Investigation, J.J.L., B.A.M., L.R. and P.G.L.; Resources, P.G.L, J.J.L., M.P.W.  
379 and R.T.K.; Data Curation, J.D.L, R.F.H., J.J.L., P.G.L., B.A.M., M.P.W. and R.T.K.;

380 Writing – Original Draft, J.D.L.; Writing – Review & Editing, J.D.L., R.F.H., P.G.L,  
381 B.A.M., M.P.W. and R.T.K.; Visualization, J.D.L. and R.F.H.; Supervision, R.T.K.;  
382 Project Administration, P.G.L., J.J.L., M.P.W. and R.T.K.; Funding Acquisition, R.T.K.  
383

## 384 References

- 385 1. Murphy M, et al. (2011) Propofol anesthesia and sleep: a high-density EEG study. *Sleep* 34(3):283-291A.
- 386 2. Prerau MJ, Brown RE, Bianchi MT, Ellenbogen JM, Purdon PL (2017) Sleep Neurophysiological Dynamics Through the Lens  
387 of Multitaper Spectral Analysis. *Physiol Bethesda Md* 32(1):60–92.
- 388 3. Purdon PL, et al. (2013) Electroencephalogram signatures of loss and recovery of consciousness from propofol. *Proc Natl  
389 Acad Sci U S A* 110(12):E1142-1151.
- 390 4. Massimini M, et al. (2005) Breakdown of cortical effective connectivity during sleep. *Science* 309(5744):2228–2232.
- 391 5. Ferrarelli F, et al. (2010) Breakdown in cortical effective connectivity during midazolam-induced loss of consciousness. *Proc  
392 Natl Acad Sci U S A* 107(6):2681–2686.
- 393 6. Boly M, et al. (2013) Consciousness in humans and non-human animals: recent advances and future directions. *Front Psychol*  
394 4:625.
- 395 7. Franks NP, Zecharia AY (2011) Sleep and general anesthesia. *Can J Anaesth J Can Anesth* 58(2):139–148.
- 396 8. Brown EN, Lydic R, Schiff ND (2010) General anesthesia, sleep, and coma. *N Engl J Med* 363(27):2638–2650.
- 397 9. He BJ, Zempel JM, Snyder AZ, Raichle ME (2010) The temporal structures and functional significance of scale-free brain  
398 activity. *Neuron* 66(3):353–369.
- 399 10. Miller KJ, Sorensen LB, Ojemann JG, den Nijs M (2009) Power-law scaling in the brain surface electric potential. *PLoS  
400 Comput Biol* 5(12):e1000609.
- 401 11. Lombardi F, Herrmann HJ, de Arcangelis L (2017) Balance of excitation and inhibition determines 1/f power spectrum in  
402 neuronal networks. *Chaos Woodbury N* 27(4):047402.
- 403 12. Colombo MA, et al. (2019) The spectral exponent of the resting EEG indexes the presence of consciousness during  
404 unresponsiveness induced by propofol, xenon, and ketamine. *NeuroImage* 189:631–644.
- 405 13. Lina J-M, O'Callaghan EK, Mongrain V (2019) Scale-Free Dynamics of the Mouse Wakefulness and Sleep  
406 Electroencephalogram Quantified Using Wavelet-Leaders. *Clocks Sleep* 1(1):50–64.
- 407 14. Miskovic V, MacDonald KJ, Rhodes LJ, Cote KA (2019) Changes in EEG multiscale entropy and power-law frequency scaling  
408 during the human sleep cycle. *Hum Brain Mapp* 40(2):538–551.
- 409 15. Susmáková K, Krakovská A (2008) Discrimination ability of individual measures used in sleep stages classification. *Artif Intell  
410 Med* 44(3):261–277.
- 411 16. Shen Y, Olbrich E, Achermann P, Meier PF (2003) Dimensional complexity and spectral properties of the human sleep EEG.  
412 Electroencephalograms. *Clin Neurophysiol Off J Int Fed Clin Neurophysiol* 114(2):199–209.
- 413 17. Pereda E, Gamundi A, Rial R, González J (1998) Non-linear behaviour of human EEG: fractal exponent versus correlation  
414 dimension in awake and sleep stages. *Neurosci Lett* 250(2):91–94.
- 415 18. Pritchard WS (1992) The brain in fractal time: 1/f-like power spectrum scaling of the human electroencephalogram. *Int J  
416 Neurosci* 66(1–2):119–129.
- 417 19. Krakovská A, Štolc S (2008) Spectral decay vs. correlation dimension of EEG. *Neurocomputing* 71(13):2978–2985.
- 418 20. Freeman WJ, Zhai J (2009) Simulated power spectral density (PSD) of background electrocorticogram (ECoG). *Cogn  
419 Neurodyn* 3(1):97–103.
- 420 21. Voytek B, et al. (2015) Age-Related Changes in 1/f Neural Electrophysiological Noise. *J Neurosci Off J Soc Neurosci*  
421 35(38):13257–13265.
- 422 22. Gao R, Peterson EJ, Voytek B (2017) Inferring synaptic excitation/inhibition balance from field potentials. *NeuroImage* 158:70–  
423 78.

- 424 23. Linkenkaer-Hansen K, Nikouline VV, Palva JM, Ilmoniemi RJ (2001) Long-range temporal correlations and scaling behavior in  
425 human brain oscillations. *J Neurosci Off J Soc Neurosci* 21(4):1370–1377.
- 426 24. Laureys S (2005) The neural correlate of (un)awareness: lessons from the vegetative state. *Trends Cogn Sci* 9(12):556–559.
- 427 25. Danker-Hopfe H, et al. (2009) Interrater reliability for sleep scoring according to the Rechtschaffen & Kales and the new AASM  
428 standard. *J Sleep Res* 18(1):74–84.
- 429 26. Helfrich RF, Mander BA, Jagust WJ, Knight RT, Walker MP (2018) Old Brains Come Uncoupled in Sleep: Slow Wave-Spindle  
430 Synchrony, Brain Atrophy, and Forgetting. *Neuron* 97(1):221-230.e4.
- 431 27. Mander BA, et al. (2013) Prefrontal atrophy, disrupted NREM slow waves, and impaired hippocampal-dependent memory in  
432 aging. *Nat Neurosci* 16(3):357–364.
- 433 28. Murphy M, et al. (2009) Source modeling sleep slow waves. *Proc Natl Acad Sci U S A* 106(5):1608–1613.
- 434 29. Dang-Vu TT, et al. (2008) Spontaneous neural activity during human slow wave sleep. *Proc Natl Acad Sci U S A*  
435 105(39):15160–15165.
- 436 30. Parvizi J, Kastner S (2018) Promises and limitations of human intracranial electroencephalography. *Nat Neurosci* 21(4):474–  
437 483.
- 438 31. Wen H, Liu Z (2016) Broadband Electrophysiological Dynamics Contribute to Global Resting-State fMRI Signal. *J Neurosci Off*  
439 *J Soc Neurosci* 36(22):6030–6040.
- 440 32. Tonner PH, Bein B (2006) Classic electroencephalographic parameters: median frequency, spectral edge frequency etc. *Best*  
441 *Pract Res Clin Anaesthesiol* 20(1):147–159.
- 442 33. Nir Y, et al. (2011) Regional slow waves and spindles in human sleep. *Neuron* 70(1):153–169.
- 443 34. Valderrama M, et al. (2012) Human gamma oscillations during slow wave sleep. *PLoS One* 7(4):e33477.
- 444 35. Funk CM, Honjoh S, Rodríguez AV, Cirelli C, Tononi G (2016) Local Slow Waves in Superficial Layers of Primary Cortical  
445 Areas during REM Sleep. *Curr Biol* 26(3):396–403.
- 446 36. Vyazovskiy VV, et al. (2011) Local sleep in awake rats. *Nature* 472(7344):443–447.
- 447 37. Siclari F, et al. (2017) The neural correlates of dreaming. *Nat Neurosci* 20(6):872–878.
- 448 38. Casali AG, et al. (2013) A theoretically based index of consciousness independent of sensory processing and behavior. *Sci*  
449 *Transl Med* 5(198):198ra105.
- 450 39. Pal D, Hambrecht-Wiedbusch VS, Silverstein BH, Mashour GA (2015) Electroencephalographic coherence and cortical  
451 acetylcholine during ketamine-induced unconsciousness. *British Journal of Anaesthesia*, 2015; 114(6): 979-89, DOI  
452 10.1093/bja/aeV095. *Br J Anaesth* 115 Suppl 1:i77.
- 453 40. Pal D, Silverstein BH, Lee H, Mashour GA (2016) Neural Correlates of Wakefulness, Sleep, and General Anesthesia: An  
454 Experimental Study in Rat. *Anesthesiology* 125(5):929–942.
- 455 41. Niethard N, et al. (2016) Sleep-Stage-Specific Regulation of Cortical Excitation and Inhibition. *Curr Biol CB* 26(20):2739–2749.
- 456 42. Vyazovskiy VV, et al. (2009) Cortical firing and sleep homeostasis. *Neuron* 63(6):865–878.
- 457 43. Timofeev I, Grenier F, Steriade M (2001) Disfacilitation and active inhibition in the neocortex during the natural sleep-wake  
458 cycle: An intracellular study. *Proc Natl Acad Sci* 98(4):1924–1929.
- 459 44. Watson BO, Levenstein D, Greene JP, Gelinás JN, Buzsáki G (2016) Network Homeostasis and State Dynamics of  
460 Neocortical Sleep. *Neuron* 90(4):839–852.
- 461 45. Leemburg S, Gao B, Cam E, Sarnthein J, Bassetti CL (2018) Power spectrum slope is related to motor function after focal  
462 cerebral ischemia in the rat. *Sleep* 41(10). doi:10.1093/sleep/zsy132.
- 463 46. Carlén M (2017) What constitutes the prefrontal cortex? *Science* 358(6362):478–482.

- 464 47. Laubach M, Amarante LM, Swanson K, White SR (2018) What, If Anything, Is Rodent Prefrontal Cortex? *eNeuro* 5(5).  
465 doi:10.1523/ENEURO.0315-18.2018.
- 466 48. Ng M, Pavlova M (2013) Why are seizures rare in rapid eye movement sleep? Review of the frequency of seizures in different  
467 sleep stages. *Epilepsy Res Treat* 2013:932790.
- 468 49. Preston AR, Eichenbaum H (2013) Interplay of hippocampus and prefrontal cortex in memory. *Curr Biol CB* 23(17):R764–  
469 R773.
- 470 50. Diekelmann S, Born J (2010) The memory function of sleep. *Nat Rev Neurosci* 11(2):114–126.
- 471 51. Stickgold R, Walker MP (2013) Sleep-dependent memory triage: evolving generalization through selective processing. *Nat*  
472 *Neurosci* 16(2):139–145.
- 473
- 474

475 **Materials and Methods**

476

477 **Participants**

478 We collected four independent datasets for this study to assess the  
479 neurophysiological basis of states of reduced arousal, namely sleep and general  
480 anesthesia. We recorded either non-invasive scalp electroencephalography (EEG) or  
481 intracranial EEG (electrocorticography; ECoG) using surface grid and strip electrodes  
482 and stereotactically placed depth electrodes (SEEG; for coverage see Fig. S2).

483

484 **Sleep**

485 *Study 1 - Sleep scalp EEG:* Study 1 was conducted at the University of California  
486 at Berkeley. All participants were informed and provided written consent in accordance  
487 with the local ethics committee (Berkeley Committee for Protection of Human Subjects  
488 Protocol Number 2010-01-595). We analyzed recordings from 20 young healthy  
489 participants ( $20.4 \pm 2.0$  years, mean  $\pm$  SD; 12 female). Polysomnography was recorded  
490 during over an 8-hour period as well as during 5 min quiescent rest with eyes closed  
491 before and after sleep. Data was recorded on a Grass Technologies Comet XL system  
492 (Astro-Med, Inc., West Warwick, RI) with a 19-channel EEG using the standard 10-20  
493 setup as well as three electromyography (EMG) and four electro-oculography (EOG)  
494 electrodes at the outer canthi. The EEG was referenced to the bilateral linked mastoids  
495 and digitized at 400 Hz (0.1 to 100 Hz)(26, 27, 52, 53). Sleep staging was carried out by  
496 trained personnel and according to the newest guidelines(54).

497

498            *Study 2 - Sleep intracranial EEG:* Study 2 was conducted at the University of  
499 California at Irvine, Medical Center. Ten epilepsy patients (6 female) undergoing  
500 invasive pre-surgical localization of their seizure focus were included in this study. All  
501 patients provided informed consent according to the local ethics committees of the  
502 University of California at Berkeley and at Irvine (University of California at Berkeley  
503 Committee for the Protection of Human Subjects Protocol Number 2010-01-520;  
504 University of California at Irvine Institutional Review Board Protocol Number 2014-1522,  
505 UCB relies on UCI Reliance Number 1817) and gave their written consent before data  
506 collection. They were between 22 and 55 years old ( $33.1 \pm 11.5$  years; mean  $\pm$  SD).  
507 Electrode placement was solely dictated by clinical criteria (Ad-Tech, SEEG: 5 mm  
508 inter-electrode spacing; Integra, Grids: 1 cm, 5 or 4 mm spacing). Data was recorded  
509 with a Nihon Kohden recording system (256 channel amplifier, model JE120A),  
510 analogue-filtered above 0.01 Hz and digitally sampled at 5 kHz. To facilitate gold-  
511 standard sleep staging, simultaneous EOG, electrocardiography (ECG) from 5 leads  
512 and EEG was recorded by exemplary electrodes of the 10 - 20 setup depending on the  
513 localization of the intracranial electrodes but mostly consisting of Fz, Cz, C3, C4 and  
514 Oz. A surrogate EMG signal was derived from the ECG and EEG by high-pass filtering  
515 above 40 Hz. Sleep staging was carried out by trained personnel.  
516  
517



518 **Anesthesia**

519           The EEG and intracranial anesthesia studies were conducted at the University  
520 Hospital of Oslo. All participants or their parents provided informed written consent  
521 according to the local ethics committee guidelines (Regional Committees for Medical  
522 and Health Research Ethics in Oslo case number 2012/2015 and extension 2012/2015-  
523 8) and the Declaration of Helsinki.

524

525           *Study 3 - Anesthesia scalp EEG:* Ten patients (2 female) undergoing anterior  
526 cervical discectomy and fusion participated in Study 3 and received a total intravenous  
527 anesthesia with remifentanyl and propofol. They had an American Society of Anesthesia  
528 status of I - III, were between 46 and 64 years old ( $53.3 \pm 5.7$  years; mean  $\pm$  SD) and  
529 otherwise healthy. Data was recorded from the induction of anesthesia to the recovery  
530 from 25 channel EEG according to the 10 - 20 layout (EEG Amplifier, Pleasanton,  
531 California, USA) with an additional row of electrodes (F9, F10, T9, T10, P9, P10) at a  
532 digitization rate of 512 Hz, or in the case of one patient at 256 Hz. The electrode for  
533 referencing was placed at CP1. Three patients were not recorded for the planned entire  
534 time span – one recording was only started after induction, while two were stopped  
535 before recovery(55).

536

537           *Study 4 - Anesthesia intracranial EEG:* A total of 12 patients (3 female) with  
538 intractable epilepsy participated in Study 4. They were between 8 and 52 years old  
539 ( $26.6 \pm 13.2$  years; mean  $\pm$  SD). Data was collected during the explantation of the  
540 intracranial electrodes from induction of anesthesia up to the point of their removal. All

541 patients received total intravenous anesthesia with propofol and remifentanil at the  
542 University Hospital of Oslo. All patients were placed back on their usual antiepileptic  
543 medication before the procedure. Data was recorded on a Natus NicoletOne system  
544 with a 128-channel capacity and a digitization rate of 1024 Hz for up to 64 or 512 Hz for  
545 up to 128 channels.

546

### 547 **Anesthetic management**

548 All patients received a premedication with 3.75 to 7.5 mg midazolam  
549 (Dormicum®, Basel, Switzerland); the anesthesia scalp EEG group (Study 1) received  
550 additional 1 g oral paracetamol (Paracet®, Weifa, Oslo, Norway) as well as 10 mg  
551 oxycodone sustained release tablet (OxyContin®, Dublin, Ireland) for postoperative pain  
552 management. Propofol (Propolipid®, Fresenius Kabi, Uppsala, Sweden) and  
553 remifentanil (Ultiva®, GlaxoSmithKline, Parma, Italy) were administered by computer-  
554 controlled infusion pumps (B Braun Perfusor Space®, Melsungen, Germany) using a  
555 target-controlled infusion (TCI) program (Schnider for propofol and Minto for  
556 remifentanil) in order to achieve plasma concentrations sufficient for anesthesia and  
557 analgesia. Prior to start of anesthesia all patients received an infusion of Ringer's-  
558 Acetate (5 ml /kg) to prevent hypotension during anesthesia induction, as well as 3 - 5  
559 ml 1 % lidocaine intravenously to prevent pain during propofol injection. All patients  
560 were pre-oxygenated with 100 % oxygen and received the non-depolarizing muscle  
561 relaxant cisatracurium for intubation (Nimbex®, GlaxoSmithKline, Oslo, Norway). After  
562 intubation the inspiratory oxygen fraction was reduced to 40 %; nitric oxide was not  
563 used.

564

## 565 **Data Preprocessing**

566 *Study 1 - Sleep scalp EEG:* Data was imported to EEGLAB(56) and epoched into  
567 5 seconds bins. Epochs that contained artifacts (e.g. eye blinks or movement) were  
568 manually inspected and rejected by a trained scorer (B.A.M.). None of the channels  
569 were discarded or interpolated. On average, the participants had  $5748.9 \pm 10.01$  of  
570 these five second epochs and  $946.95 \pm 542.68$  of them were rejected ( $16.44 \pm 2.98$  %).  
571 The data from the healthy sleep participants has been published before and was  
572 cleaned in a comparable approach(26, 27, 52, 53). For further analysis in MATLAB  
573 (MATLAB Release R2017b, The MathWorks, Inc., Natick, Massachusetts, United  
574 States) the data was then imported into FieldTrip(57).

575

576 *Study 2 – Sleep intracranial EEG:* Data was imported to FieldTrip(57),  
577 downsampled to 500 Hz and segmented into 30 seconds segments for subsequent data  
578 analysis. Anatomical localization was carried out by fusing pre-implantation T1-weighted  
579 Magnetic Resonance Imaging (MRI) scans with post-implantation MRI and both  
580 automatic and manual labelling of the electrode position (see above). Epileptic, white  
581 matter and channels with other artifacts were discarded. The data was bipolar  
582 referenced, demeaned and detrended.

583

584 *Study 3 - Anesthesia scalp EEG:* Data was imported into FieldTrip(57) and  
585 epoched in 10 second bins. An Independent Component Analysis (*fastica*(58)) was  
586 used to clean the data from systematic artifacts such as the ECG. Further data cleaning

587 was done manually after inspection by a neurologist (R.T.K.) and an anesthesiologist  
588 (J.D.L). On average, the patients had  $1183 \pm 81.42$  ten second epochs of which  $196 \pm$   
589  $103.19$  were marked as noisy ( $15.81 \pm 3.15$  %); comparable to the sleep EEG study  
590 (Study 1). No channels were excluded or interpolated. Data was referenced using the  
591 common average, demeaned and detrended. Wake periods were defined as time  
592 before induction and after anesthesia when the patients responded reliably to verbal  
593 commands of the study personnel. Anesthesia periods were defined as time after  
594 induction until the termination of propofol application.

595

596 *Study 4 – Anesthesia intracranial EEG:* Data was recorded with a 512 Hz  
597 digitization rate in eight patients. Four additional patients were recorded with a  
598 digitization rate of 1024 Hz and these datasets were down-sampled to 512 Hz. Data  
599 was then imported to FieldTrip(57), epoched into 10-second segments and inspected by  
600 a neurologist (R.T.K.) for epileptic activity and manually cleaned of epileptic and other  
601 non-neural artifacts. The awake state was defined as time before start of propofol,  
602 anesthesia was defined as time after loss of consciousness (unresponsiveness to  
603 verbal commands assessed by study personnel and attending anesthetist). After fusing  
604 the pre-implantation T1-weighted MRI and the post-implantation Computer Tomography  
605 (CT) scans, electrodes were automatically localized by an openly available brain atlas  
606 (Freesurfer(59)) in parallel with manual positioning by experienced neurologists for  
607 cross validation. Contacts in white matter or lesions were discarded. The remaining  
608 signals were then bipolar referenced to their lateral neighbor, demeaned and detrended.

609

## 610 **Spectral Analysis**

611 (1) To obtain average power spectra, after artifact removal the data was epoched  
612 into 10 second segments for anesthesia and 30 second segments for sleep. (2) Time-  
613 frequency decomposition was accomplished by using the Fast Fourier Transformation  
614 (*mtmfft*, FieldTrip(57)) from 0.5 Hz to 45 Hz in 0.5 Hz steps. The analysis was limited to  
615 45 Hz due to line noise at 50 Hz in the Oslo recordings and then adopted to all  
616 consecutive studies for consistency. To obtain reliable spectral estimates we utilized a  
617 multi-taper approach based on discrete prolate slepian sequences (*dpss*; anesthesia: 9  
618 tapers for 10 second segments, no overlap, frequency smoothing of  $\pm 0.5$  Hz; sleep: 29  
619 tapers for 30 second segments, no overlap, frequency smoothing of  $\pm 0.5$  Hz). The  
620 power spectrum of each state was averaged over all samples of the state (rest or wake,  
621 non-rapid eye movement sleep stage 3 (N3) and rapid eye movement sleep (REM) or  
622 wake and anesthesia), channels and subjects (Fig. 1b, c and Fig. 2b, c). For better  
623 comparison, we visualized the effect on the scalp level. For study 4 no simultaneous  
624 EEG recordings were available. (2) To elucidate the time frequency relationship over  
625 time as depicted in Figure 1a and 2a, we again employed a multi-taper spectral analysis  
626 of frequencies between 0.5 and 45 Hz in 0.5 Hz steps this time using a sliding,  
627 overlapping time window (anesthesia: 10 seconds, 96% overlap, frequency smoothing  
628 of  $\pm 0.5$  Hz and 9 dpss tapers; sleep: 30 seconds, 85% overlap, frequency smoothing of  
629  $\pm 0.5$  Hz and 29 dpss tapers).

630

## 631 **Spectral slope estimation**

632           We calculated the spectral slope by fitting a linear regression line to the higher  
633 frequency 1/f slope of the power spectrum in the range from 30 - 45 Hz, because it had  
634 been shown that fitting in this range best correlates with the E/I balance(22). In line with  
635 previous reports, we excluded the low frequencies that contain strong oscillatory  
636 responses, which distort the linear fit as well as the range over 50 Hz, which is  
637 confounded by both line noise (50 Hz in Europe, 60 Hz in the US) as well as broad-  
638 band muscle artifacts.

639           We then adapted this range to the calculation of the slope in the other studies for  
640 consistency reasons. To compute a time resolved estimate of the spectral slope, we  
641 calculated the best line fit to the 10 (anesthesia) or 30 (sleep) second segments of the  
642 multi-tapered power spectra (see above) in log-log space using polynomial curve fitting  
643 (*polyfit.m*, MATLAB and Curve Fitting Toolbox Release R2015a, The MathWorks, Inc.,  
644 Natick, Massachusetts, United States). One subject in Study 1 (sleep EEG) had only  
645 noisy wake trials; therefore, his data had to be excluded from all slope comparisons to  
646 wakefulness.

647

648

649

## 650 **Mutual Information**

651 Mutual Information (MI) is a metric of information theory to assess the mutual  
652 dependence of the two signals, specifically the amount of information gained about one  
653 variable when observing the other(60). This is particularly useful for non-linear, binned  
654 signals that need to be analyzed independent of rank. Mutual information between the  
655 two signals X and Y is defined as

$$MI(X;Y) = \sum_{x \in X} \sum_{y \in Y} p(x,y) * \log_2 \left( \frac{p(x,y)}{p(x) * p(y)} \right)$$

656 where  $p(x,y)$  depicts the joint probability function and  $p(x)$  and  $p(y)$  indicate the class  
657 probabilities. Probabilities were normalized by their sum. For MI analysis (Fig. 1b, Fig.  
658 S4, S7, S10), we epoched the time-resolved slope into 30 second segments (the  
659 hypnogram was staged in 30 second epochs) and discretized it into five bins from  
660 minimum to maximum (Wake, REM, N1, N2, N3) using the *discretize.m* function of  
661 MATLAB Signal Processing Toolbox Release R2015a (MathWorks Inc., USA).

662

## 663 **Spectral slope estimation during a slow wave**

664 Slow wave events (Fig. S8, S9) were detected for each channel based on  
665 established algorithms(61): The raw signal was bandpass-filtered between 0.16 and  
666 1.25 Hz and zero crossings were detected. Events were then selected using a time (0.8  
667 to 2 s duration) and an amplitude criterion (75 % percentile). The raw data was then  
668 epoched relative to the trough of the slow wave ( $\pm 2.5$  s). Time-frequency  
669 decomposition was computed in 500 ms time windows with a 250 ms overlap using  
670 FieldTrip(57) (*mtmfft*, frequency smoothing of  $\pm 2$  Hz and 1 dpss taper). The spectral  
671 slope was calculated by the best line fit in these time windows in log-log space between

672 30 - 45 Hz using polynomial curve fitting (*polyfit.m*, MATLAB and Curve Fitting Toolbox  
673 Release R2015a, MathWorks, Inc., USA).

674

### 675 **Classification analysis**

676 We employed a linear discriminant analysis (LDA) to assess if slow wave power  
677 or the spectral slope were a better predictor of wakefulness or sleep. We utilized a  
678 leave-one-exemplar-out cross-validation approach that was repeated 50 times after  
679 randomly sampling an equal number of sleep and REM trials to equate the number of  
680 samples. Then every sample of the subsampled distribution was held out of the training  
681 dataset once. The LDA classifier was trained on the remaining samples and tested on  
682 the held-out test sample. The classifier performance was then assessed as percent  
683 correct. Two of the 20 sleep EEG participants had to be excluded due to insufficient  
684 number of wake trials.

685

### 686 **Statistical testing**

687 To compare three states (awake, NREM and REM), we utilized Greenhouse-  
688 Geisser corrected 1-way repeated measures analysis of variance (Fig. 1b, 1c; RM-  
689 ANOVA). Effect size was calculated using Cohen's d. The spectral slope of the awake  
690 and anesthetized state was compared using Student's t-test for paired samples (Fig. 2b,  
691 c).

692 To assess the spatial extent of the observed effects in EEG, we calculated  
693 cluster-based permutation tests to correct for multiple comparisons as implemented in  
694 FieldTrip(57) (Monte-Carlo method; maxsize criterion; 1000 iterations). A permutation



695 distribution was obtained by randomly shuffling condition labels and then compared to  
696 the actual distribution to obtain an estimate of significance. Spatial clusters are formed  
697 by thresholding independent t-tests of slope differences between wake and sleep (Fig.  
698 1b) or wake and anesthesia (Fig. 2b) at a p value < 0.05. All results were Bonferroni-  
699 corrected for multiple comparisons. In order to control for EMG as a potential confound  
700 in the sleep EEG (Study 1), we utilized a partial correlation (Spearman) that partialled  
701 the slope of the EMG out of the correlation before computing the cluster-based  
702 permutation test (Fig. S4a). Correlation coefficients (r-values) were transformed into t-  
703 values using the following formula (N = number of subjects):

$$t = \frac{r * \text{sqrt}(N - 2)}{\text{sqrt}(1 - r^2)}$$

704 For statistical assessment of the Mutual Information, we employed surrogate  
705 testing (Fig. 1b, Fig. S4a). To obtain a surrogate distribution from the observed data, we  
706 utilized a random block swapping procedure(62, 63). The number of repetitions was  
707 equal to the number of available sleep stages. On every iteration, we re-calculated the  
708 MI of these block swapped hypnograms with the discretized time-resolved slope to  
709 create a surrogate distribution against which we could compare our original observation.  
710 To compare the results across subjects, we z-scored the values by subtracting the  
711 mean of the surrogate distribution from the observed MI and dividing by the standard  
712 deviation of the surrogate distribution. Note that a z = 1.96 reflects an uncorrected two-  
713 tailed p-value of 0.05, while a z-score of >2.8 indicates a Bonferroni-corrected  
714 significant p-value (p < 0.05 / 19 channels = 0.0026). The z-values were transformed  
715 into p-values for topographic display (Fig.1b; Fig. S4a) based on a normal cumulative  
716 distribution function (two-tailed).

717

## 718 **Connectivity**

719 For the analysis of fronto-parietal connectivity (Fig. S10), we choose electrode Fz  
720 and Pz in our sleep EEG recordings (Study 1;  $n = 20$ ) to calculate the magnitude  
721 squared coherence from frequencies of 0.1 to 64 Hz in 0.1 Hz steps using the  
722 *mscohere.m* function from the MATLAB Signal Processing Toolbox and described  
723 previously(39, 40). Note that coherence estimates reflect both power changes as well  
724 as changes in phase synchrony. Therefore, we also calculated the Phase-Locking  
725 Value (PLV) and amplitude correlations ( $\rho$ ) to disentangle the effects of phase and  
726 power, respectively. To discount the effects of volume spread, we calculated the  
727 imaginary PLV(64) (iPLV) and orthogonalized power correlations(65) ( $\rho_{ortho}$ ).

728 We then quantified the Mutual Information(60) (MI; see above) to compare how well the  
729 results capture the changes between different sleep stages across the night. For this  
730 analysis we only utilized the slope values of electrode Fz (as we were calculating the  
731 other measures in Fz-Pz) and defined theta from 4-10 Hz analog to Pal et al.(39, 40).

732

## 733 Additional References for Methods

- 734 52. Mander BA, et al. (2015)  $\beta$ -amyloid disrupts human NREM slow waves and related hippocampus-dependent memory  
735 consolidation. *Nat Neurosci* 18(7):1051–1057.
- 736 53. Mander BA, et al. (2014) Impaired prefrontal sleep spindle regulation of hippocampal-dependent learning in older adults. *Cereb*  
737 *Cortex N Y N* 1991 24(12):3301–3309.
- 738 54. Silber MH, et al. (2007) The visual scoring of sleep in adults. *J Clin Sleep Med JCSM Off Publ Am Acad Sleep Med* 3(2):121–  
739 131.
- 740 55. Juel BE, Romundstad L, Kolstad F, Storm JF, Larsson PG (2018) Distinguishing Anesthetized from Awake State in Patients: A  
741 New Approach Using One Second Segments of Raw EEG. *Front Hum Neurosci* 12. doi:10.3389/fnhum.2018.00040.
- 742 56. Delorme A, Makeig S (2004) EEGLAB: an open source toolbox for analysis of single-trial EEG dynamics including independent  
743 component analysis. *J Neurosci Methods* 134(1):9–21.
- 744 57. Oostenveld R, Fries P, Maris E, Schoffelen J-M (2011) FieldTrip: Open source software for advanced analysis of MEG, EEG,  
745 and invasive electrophysiological data. *Comput Intell Neurosci* 2011:156869.
- 746 58. Hyvarinen A (1999) Fast and robust fixed-point algorithms for independent component analysis. *IEEE Trans Neural Netw*  
747 10(3):626–634.
- 748 59. Fischl B (2012) FreeSurfer. *NeuroImage* 62(2):774–781.
- 749 60. Quiñero R, Panzeri S (2009) Extracting information from neuronal populations: information theory and decoding  
750 approaches. *Nat Rev Neurosci* 10(3):173–185.
- 751 61. Staresina BP, et al. (2015) Hierarchical nesting of slow oscillations, spindles and ripples in the human hippocampus during  
752 sleep. *Nat Neurosci* 18(11):1679–1686.
- 753 62. Canolty RT, et al. (2006) High Gamma Power Is Phase-Locked to Theta Oscillations in Human Neocortex. *Science*  
754 313(5793):1626–1628.
- 755 63. Aru J, et al. (2015) Untangling cross-frequency coupling in neuroscience. *Curr Opin Neurobiol* 31:51–61.
- 756 64. Nolte G, et al. (2004) Identifying true brain interaction from EEG data using the imaginary part of coherency. *Clin Neurophysiol*  
757 *Off J Int Fed Clin Neurophysiol* 115(10):2292–2307.
- 758 65. Hipp JF, Hawellek DJ, Corbetta M, Siegel M, Engel AK (2012) Large-scale cortical correlation structure of spontaneous  
759 oscillatory activity. *Nat Neurosci* 15(6):884–890.

760

761

762

763

764 **Supplemental Figures**  
765

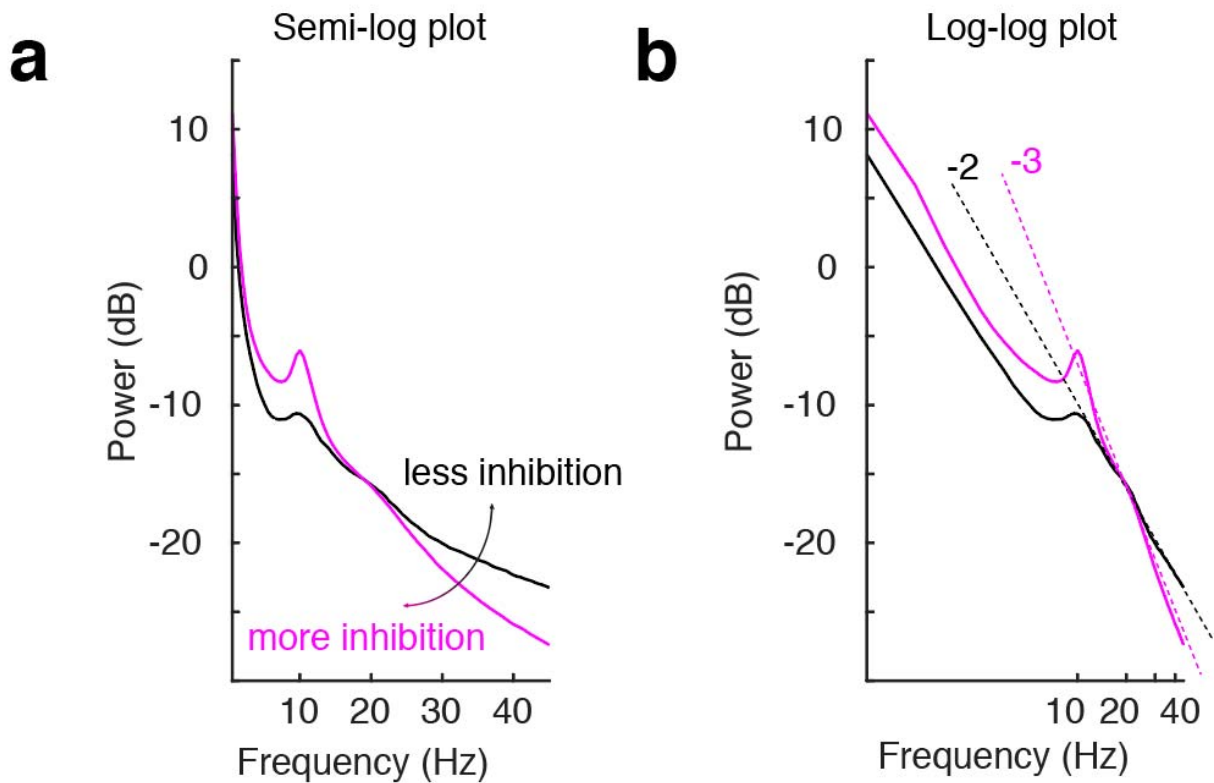

766  
767 **Fig. S1: The spectral slope - a surrogate marker for excitation / inhibition balance.**  
768 **a**, Power spectral density (PSD) in semi-log plot. Example wake (black) and anesthesia PSD (magenta).  
769 More inhibition results in a steeper decrease of the PSD in frequencies above 30 Hz. **b**, PSD in a log-log  
770 plot. Example wake (black) and anesthesia PSD (magenta) with linear fits to 30 – 50 Hz for both states  
771 (dotted lines). The linear fit reveals a more negative spectral slope for states with higher inhibition.  
772

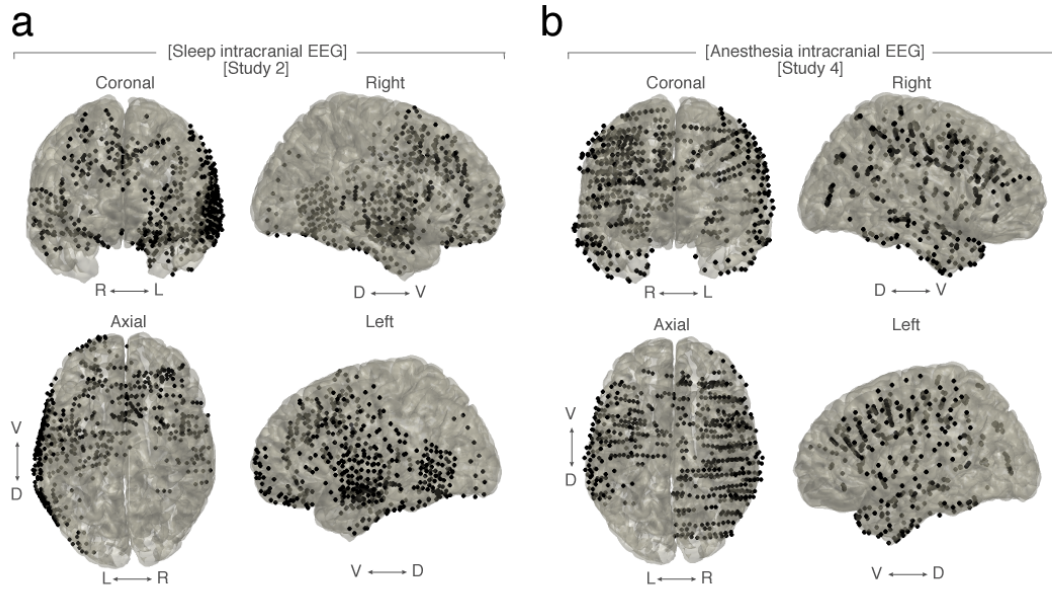

773

774 **Fig. S2: Coverage in intracranial subjects.**

775 **a**, Sleep intracranial EEG – Grid and SEEG contacts of all subjects ( $n = 10$ ) plotted on MNI brain. Right

776 (R), left (L), ventral (V), dorsal (D). **b**, Anesthesia intracranial EEG – Grid, Strip and SEEG contacts of all

777 subjects ( $n = 12$ ) plotted on a Montreal Neurological Institute (MNI) brain. Right (R), left (L), ventral (V),

778 dorsal (D).

779

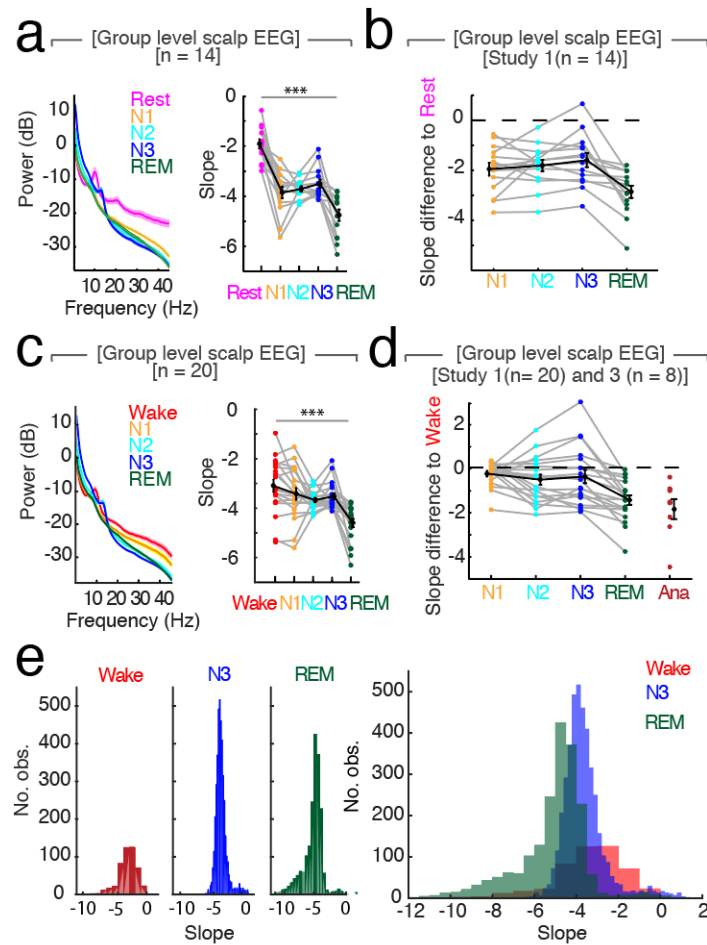

780

781 **Fig. S3: Relative changes of spectral slope reliably differentiate between wakefulness, sleep and**  
 782 **general anesthesia.**

783 **a**, Left – Mean power spectra ( $\pm$  SEM) averaged across all channels and subjects ( $n = 14$ ) during rest  
 784 recording of 5 min eyes closed recorded before sleep compared to all sleep stages. Right – Slope values.

785 Mean  $\pm$  SEM in black. Repeated measures ANOVA: \*\*\*  $p < 0.001$ ,  $F_{2.54, 33.02} = 38.02$ ,  $d_{\text{Rest-Sleep}} = 3.52$ .

786 Post-hoc t-tests:  $p_{\text{Rest-N2}} < 0.001$ ;  $t_{13} = 7.97$ ;  $d = 3.31$ ;  $p_{\text{Rest-N3}} < 0.001$ ;  $t_{13} = 5.69$ ;  $d = 2.49$ ;  $p_{\text{Rest-REM}} < 0.001$ ;

787  $t_{13} = 11.67$ ;  $d = 3.71$ ;  $p_{\text{N3-REM}} < 0.0001$ ;  $t_{13} = 4.44$ ;  $d = 1.70$ . **b**, Slope differences of all sleep stages to rest

788 ( $n = 14$ ). Mean  $\pm$  SEM in black. **c**, Left - Mean power spectra ( $\pm$  SEM) averaged across all channel and

789 subjects ( $n = 20$ ) during wakefulness and all sleep stages. Right - Slope values. Mean  $\pm$  SEM in black.

790 Repeated measures ANOVA: \*\*\*  $p < 0.001$ ,  $F_{1.86, 33.49} = 13.39$ ,  $d_{\text{Wake-Sleep}} = 0.79$ . Post-hoc t-tests:  $p_{\text{Wake-N2}} =$

791  $0.029$ ,  $t_{18} = 2.36$ ,  $d = 0.69$ ;  $p_{\text{Wake-N3}} = 0.19$ ;  $t_{18} = 1.34$ ;  $d = 0.48$ ;  $p_{\text{Wake-REM}} < 0.0001$ ;  $t_{18} = 6.83$ ;  $d = 1.58$ ;  $p_{\text{N3-}}$

792  $\text{REM} < 0.0001$ ;  $t_{19} = 5.12$ ;  $d = 1.66$ . **d**, Slope difference of all sleep stages to all wake trials ( $n = 20$ ) and

793 anesthesia to wake trials before anesthesia ( $n = 8$ ). Mean  $\pm$  SEM in black. **e**, Histogram of slope values

794 pooled across all participants ( $n = 20$ ). Wakefulness (red), N3 (blue), REM (green). Left: Separated values

795 of each sleep stage. Right: All three sleep stages within one plot.

796

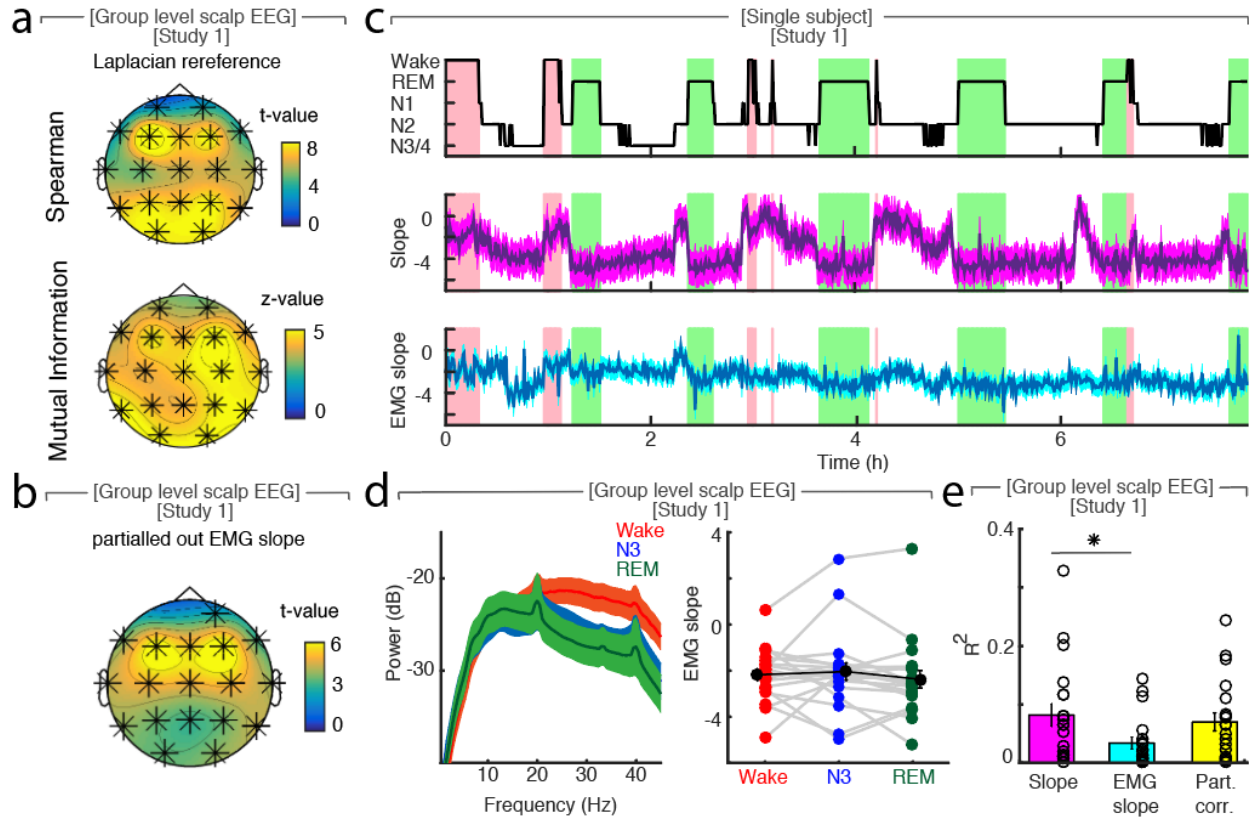

797

798

**Fig. S4: The spectral slope is not confounded by muscle activity.**

799

800

801

802

803

804

805

806

807

808

809

810

811

812

813

814

815

**a**, Laplacian re-reference ( $n = 20$ ). Upper topoplot: Cluster permutation test of Spearman rank correlation between hypnogram and time-resolved slope. \*  $p < 0.05$ . Lower topoplot: Mutual Information between slope and hypnogram. Statistic with random block swapping. \*  $p < 0.05$ . **b**, Cluster permutation test of Spearman rank correlation between hypnogram and time-resolved slope with electromyography (EMG) slope partialled out ( $n = 20$ ). \*  $p < 0.05$ . **c**, Hypnogram of a single subject (upper panel), time-resolved slope averaged over EEG channels F3, Fz and F4 (middle panel), time-resolved slope of EMG signal averaged over three EMG channels (lower panel). **d**, EMG signal on group level across a full night ( $n = 20$ ). Left: Power spectra of EMG (mean  $\pm$  SEM). Right: Slope of EMG in wakefulness (red), NREM stage 3 (blue), REM (green), grand average (black, mean  $\pm$  SEM). **e**,  $R^2$  of Spearman rank correlations averaged across all channels between hypnogram and slope (magenta), EMG slope (cyan) and the slope with the EMG slope partialled out (yellow, all mean  $\pm$  SEM). The correlation of hypnogram - slope and hypnogram - EMG slope is significantly different (paired t-test:  $p = 0.0059$ ,  $t_{19} = 3.10$ ). Furthermore, we utilized the LDA classification approach to test if the spectral slope outperforms the EMG slope for state discrimination. We found that the spectral slope performed significantly better at distinguishing all three states ( $t = 4.19$ ,  $p < 0.001$ ,  $d = 1.24$ ; slope:  $58.09 \pm 2.35\%$ , EMG slope:  $46.03 \pm 2.12\%$ ; chance 33%). Likewise, the slope was better at discriminating only WAKE and REM ( $t = 3.03$ ,  $p = 0.008$ ,  $d = 0.89$ ; slope:  $76.32 \pm 3.61\%$ , EMG slope:  $64.89 \pm 2.24\%$ ; chance 50%).

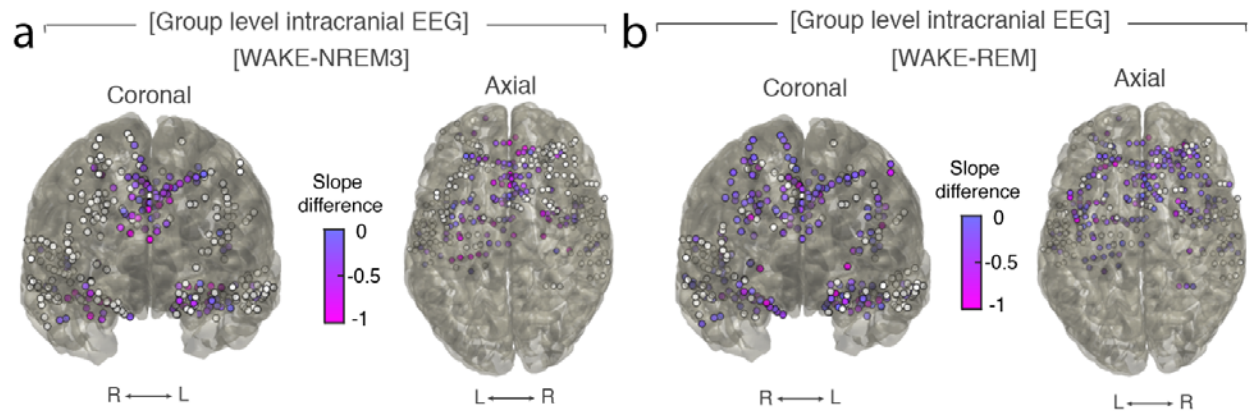

816

817 **Fig. S5: Differences of spectral slope in intracranial electrodes between waking and NREM 3 or**  
818 **REM sleep (n = 10).**

819 **a**, Left – coronal, right – axial view of electrodes that followed observed EEG pattern with a more negative  
820 slope for NREM 3 sleep than for waking (magenta). Electrodes that did not show the pattern are depicted  
821 in white. Right (R), left (L). **b**, Left – coronal, right – axial view of electrodes that followed observed EEG  
822 pattern with a more negative slope for REM sleep than for waking (magenta). Electrodes that did not  
823 show the pattern are depicted in white. Right (R), left (L).

824



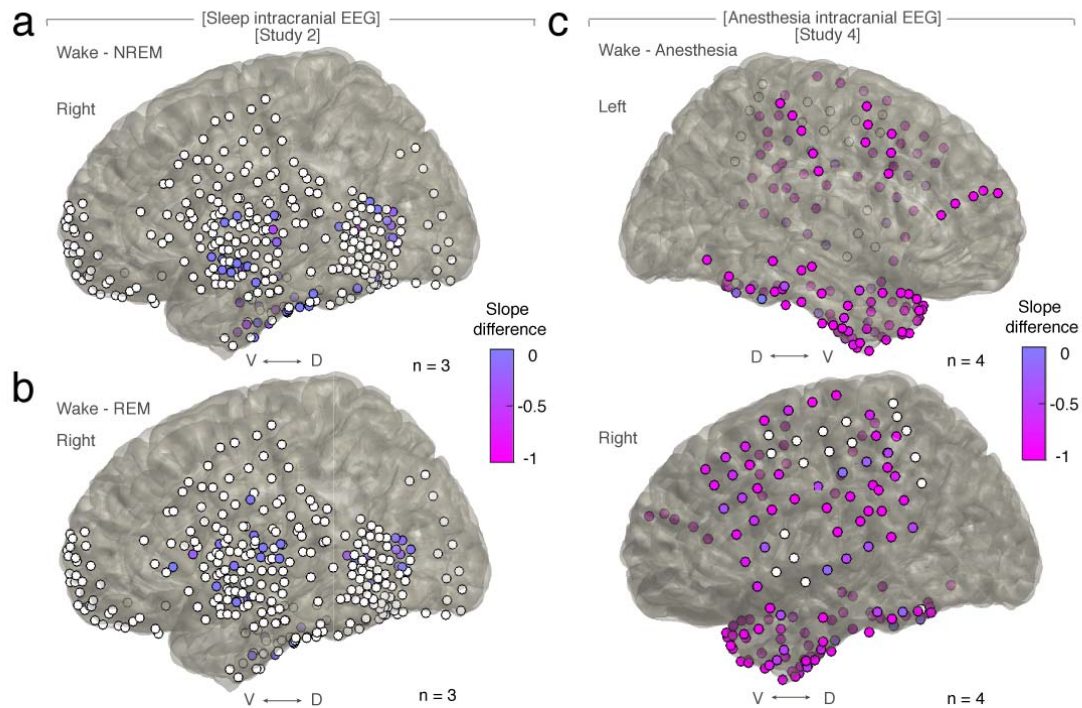

825

826 **Fig. S6: Differences in spectral slope in sleep and under general anesthesia in cortical electrodes.**

827 **a**, All grid and strip contacts of 3 patients plotted on MNI brain. Electrodes that followed the pattern of  
828 more negative slope in NREM stage 3 sleep than in waking are colored purple to magenta. Electrodes  
829 that did not show the pattern are depicted in white. Ventral (V), dorsal (D). **b**, All grid and strip contacts of  
830 3 patients plotted on MNI brain. Electrodes that followed the pattern of more negative slope in REM sleep  
831 than in waking are colored in purple to magenta. Electrodes that did not show the pattern are depicted in  
832 white. Ventral (V), dorsal (D). **c**, All grid and strip contacts of 4 patients plotted on MNI brain. Electrodes  
833 that followed the pattern of more negative slope under anesthesia than in waking are colored in purple to  
834 magenta. Electrodes that did not show the pattern are depicted in white. Right (R), left (L), ventral (V),  
835 dorsal (D).

836

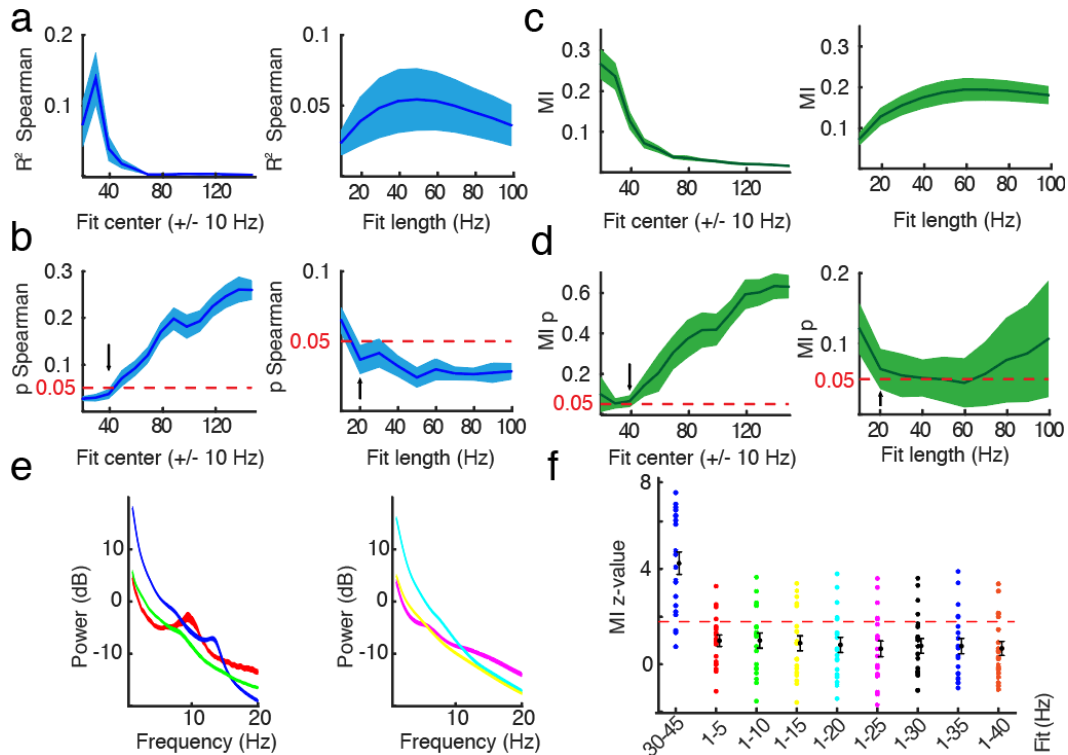

837

838 **Fig. S7: Evaluation of different slope fit settings in intracranial sleep.** **a**, Spearman rank correlation  
 839 ( $R^2$ ) between slope and hypnogram with different slope fits with center frequencies from 20 to 150  $\pm$  10  
 840 Hz with SEM in intracranial data during sleep (blue;  $n = 10$ ). Red dotted line for p value of 0.05. Black  
 841 arrow indicates used center frequency of 40 Hz (30 – 50 Hz) for this study. **b**, Spearman rank correlation  
 842 ( $R^2$ ) with different slope fit length from 30 to 40 Hz up to 30 to 130 Hz (10 – 100 Hz fit length) with SEM  
 843 (blue). Red dotted line for p value of 0.05. Black arrow indicates used fit length for this study (20 Hz; 30 –  
 844 50 Hz). To control for the shared variance between SO power and the spectral slope, we repeated the  
 845 correlations and partialled out the corresponding SO power, which left the results unchanged ( $t_{19} = 1.37$ ,  $p$   
 846  $= 0.188$ ,  $d = 0.21$ ; before:  $R^2 = 0.13 \pm 0.03$ ; after:  $R^2 = 0.09 \pm 0.03$ ). **c**, Mutual Information (MI) between  
 847 slope and hypnogram with different slope fits with center frequencies from 20 to 150  $\pm$  10 Hz with SEM in  
 848 intracranial data during sleep (green;  $n = 10$ ). Red dotted line for p value of 0.05. Black arrow indicates  
 849 used center frequency of 40 Hz (30 – 50 Hz) for this study. **d**, Mutual Information (MI) with different slope  
 850 fit length from 30 to 40 Hz up to 30 to 130 Hz (10 – 100 Hz fit length) with SEM (green). Red dotted line  
 851 for p value of 0.05. Black arrow indicates used fit length for this study (20 Hz; 30 – 50 Hz). **e**, Mixed (left)  
 852 and fractal component (right) of power spectra in scalp EEG ( $n = 20$ ) after IRASA. **f**, Z-value of surrogate  
 853 distribution (random block swapping) of Mutual Information (MI) between slope and hypnogram using the  
 854 original (blue, 30-45 Hz) and different slope fits to fractal component (obtained by IRASA) in lower  
 855 frequencies. Note that a  $z = 1.96$  reflects an uncorrected two-tailed p-value of 0.05, while a z-score of  
 856  $>2.8$  indicates a Bonferroni-corrected significant p-value ( $p < 0.05 / 19$  channels = 0.0026).

857

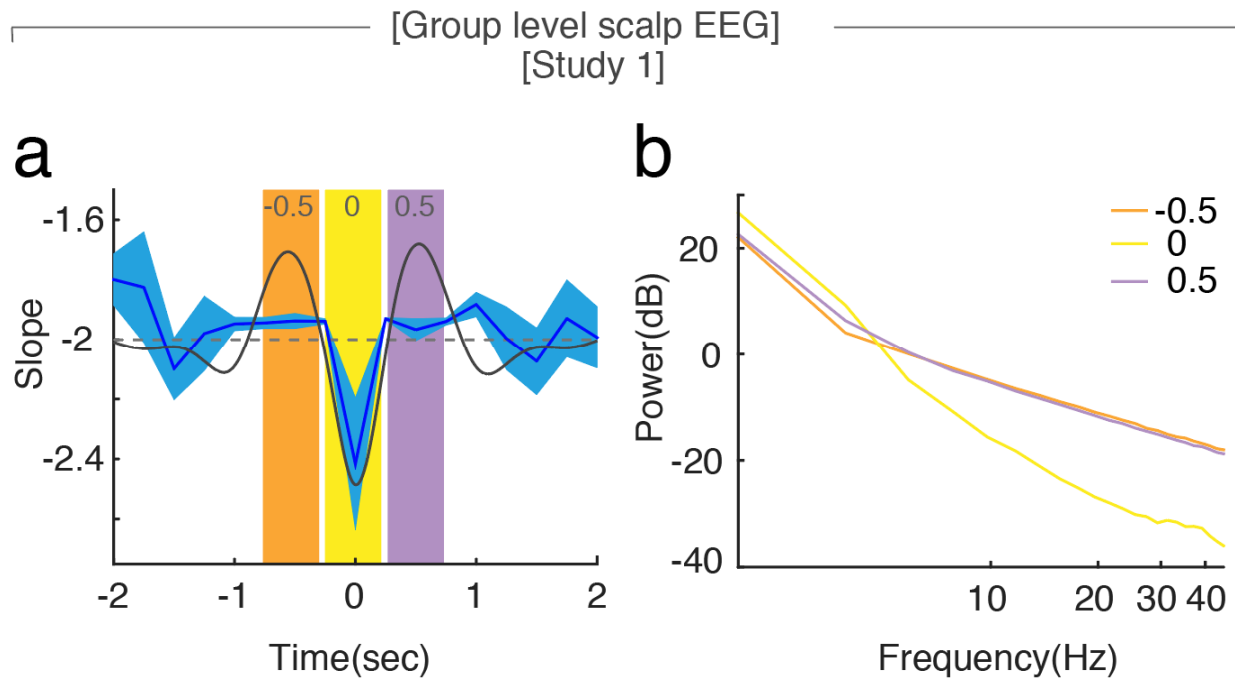

858

859 **Fig. S8: The spectral slope tracks changes in inhibition during slow waves.**

860 **a**, Average spectral slope changes over the time course of all slow waves in scalp EEG ( $n = 20$ ) during  
861 sleep (blue; mean  $\pm$  SEM), Superimposed in gray is the average slow wave of all subjects. Highlighted  
862 are the following time windows: -750 to -250 (orange), -250 to 250 (yellow) and 250 to 500 ms (purple). **b**,  
863 Power spectra in log-log space within specified time windows during the slow wave: -750 to -250 (center:  
864 -0.5 s; orange), -250 to 250 (center: 0 s; yellow) and 250 to 500 ms (center: 0.5 s; purple). Note the steep  
865 power decrease during the through of the slow wave (yellow).

866

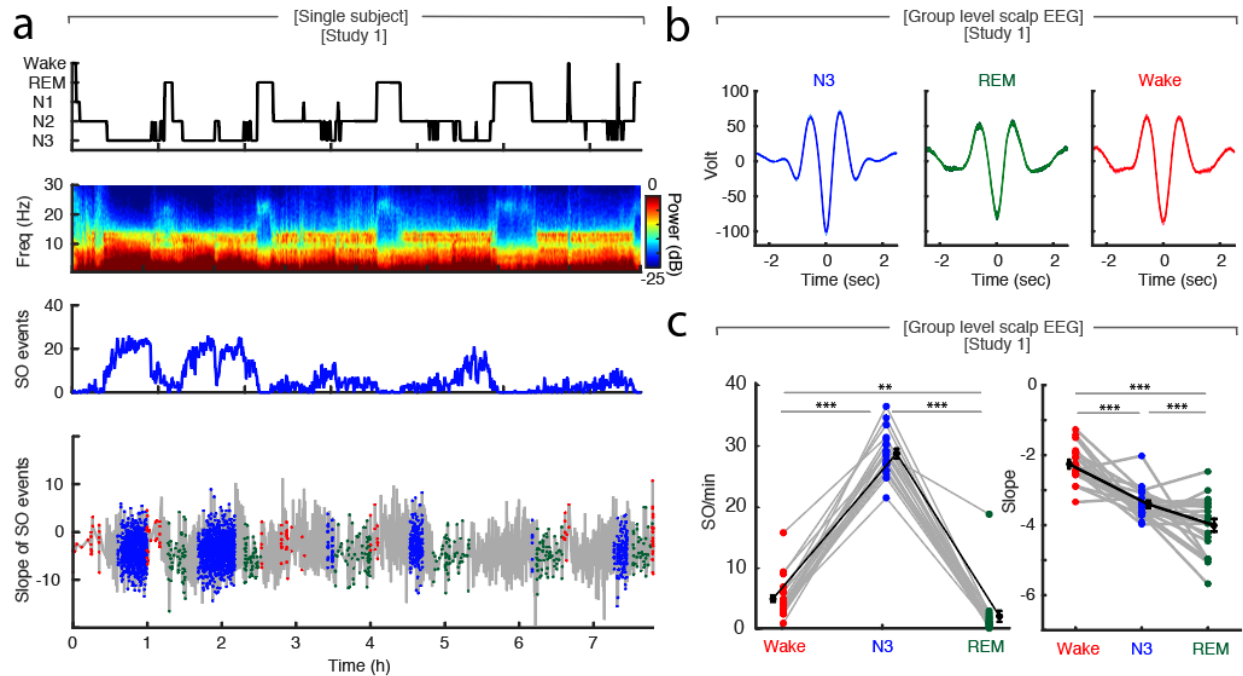

867

868 **Fig. S9: Slow waves during wakefulness, N3 and REM sleep in scalp EEG.**

869 **a**, Single subject example: Upper panel: Hypnogram. Upper middle panel: Multitapered spectrogram of  
 870 electrode Fz. Lower middle panel: Number of slow wave (SO) events during 30 second segments of  
 871 sleep in electrode Fz. Note the decreasing number of SO events during the course of the night. Lower  
 872 panel: Spectral slope of SO events occurring in N3 (blue), wakefulness (red) and REM sleep (green) in  
 873 electrode Fz. Background: Time-resolved slope of electrode Fz in light grey. **b**, Group level (n = 20)  
 874 average waveforms in electrode Fz during N3 (blue), REM sleep (green) and wakefulness (red; mean ±  
 875 SEM). **c**, Left: Slow wave events per minute in wakefulness (red), N3 (blue) and REM (green) in scalp  
 876 EEG channel FZ (n = 20). In black mean ± SEM. Paired t-test: \*\* p < 0.01, \*\*\* p < 0.001. Right: Slope of  
 877 slow wave events on the group level (n = 20; averaged across all 19 EEG electrodes) in wakefulness  
 878 (red), N3 (blue) and REM sleep (green). Mean ± SEM in black. Paired t-test: \*\*\* p < 0.001.

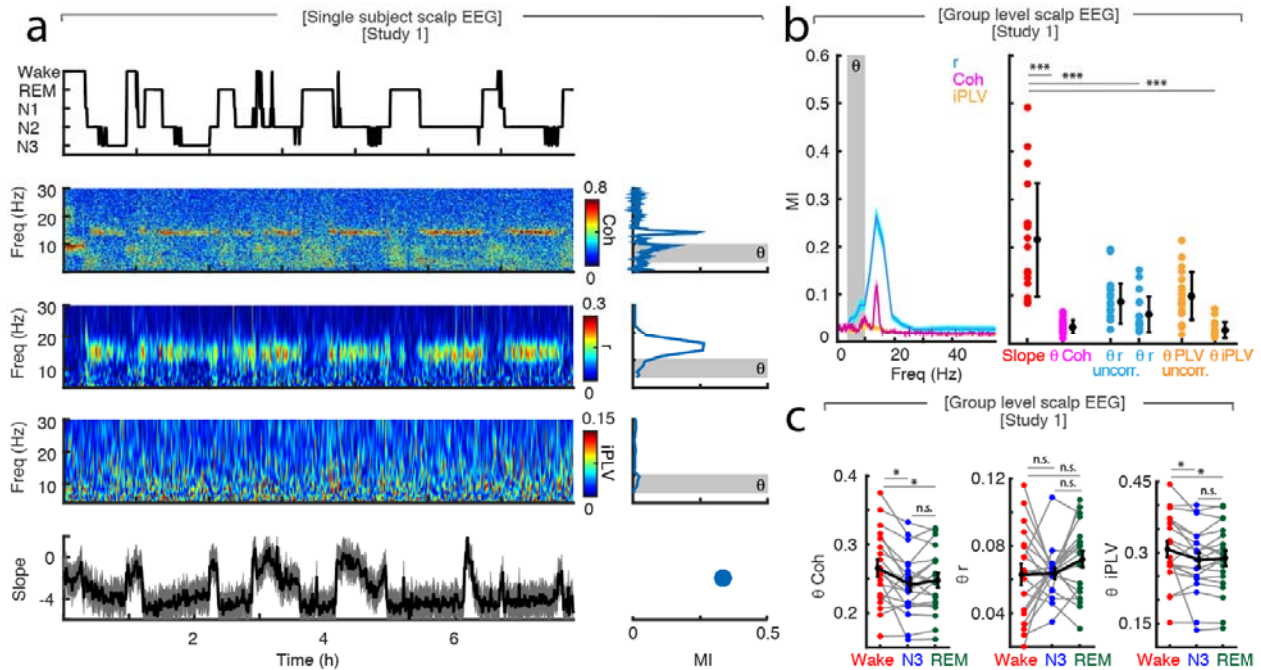

879

880 **Fig. S10: Comparison of Mutual Information captured by fronto-parietal connectivity and spectral**  
 881 **slope.**

882 **a**, Single subject example: Upper panel – hypnogram. Middle panels – Fz-Pz coherence (Coh), Fz-Pz  
 883 connectivity measured by orthogonalized power correlation ( $r$ ) and imaginary phase-locking value (iPLV)  
 884 between 0.1 and 30 Hz. Right subpanels - Accompanying mutual information between the hypnogram  
 885 and all frequencies, theta ( $\theta$ ; 4-10 Hz) highlighted in grey. Lower panel – spectral slope (30 - 45 Hz) of Fz.  
 886 Right subpanel – Mutual information of the Fz slope. **b**, Group level ( $n = 20$ ) analysis of mutual  
 887 information for Fz-Pz coherence and connectivity measured by orthogonalized power correlation ( $r$ ) or  
 888 imaginary phase-locking value (iPLV). Left panel – Across all frequencies. Right panel – Comparison of  
 889 mutual information between Fz slope, theta ( $\theta$ ) coherence and connectivity measured by power  
 890 correlation (uncorrected and orthogonalized) as well as phase-locking value (uncorrected and imaginary).  
 891 Paired t-test: \*\*\*  $< 0.001$ . **c**, Group level ( $n = 20$ ) comparison of Fz-Pz theta ( $\theta$ ) coherence,  
 892 orthogonalized power correlation ( $r$ ) and weighted phase-locking value (iPLV) between wakefulness, N3  
 893 and REM sleep, showing that these metrics do not reliably distinguish between N3/SWS and REM sleep.  
 894 Paired t-test: n.s. – not significant, \*  $p < 0.05$ .

895

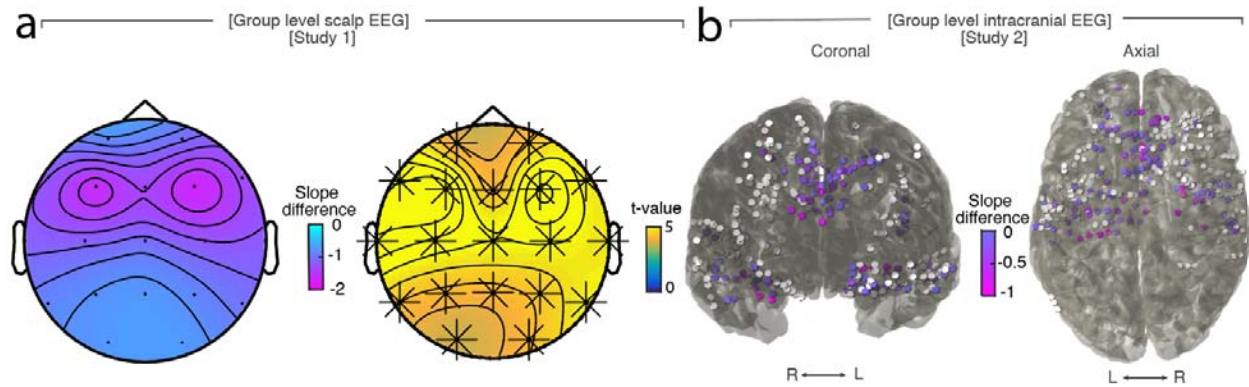

896

897 **Fig. S11: Slope difference between N3 and REM sleep.**

898 **a**, Scalp EEG ( $n = 20$ ). Left: Topography of slope difference, Right: Cluster permutation test between

899 slope of N3 and REM. \*  $p < 0.05$ . **b**, Depth electrodes ( $n = 10$ ). Left – Coronal view. Right – Axial view on

900 an MNI brain contain all intracranial electrodes of all patients. Colored – contacts that showed a more

901 negative slope in REM compared to N3 slope. White – contacts that did not show the pattern.

902
